# Supplementary material for: C–F bond activation of perfluorinated arenes using NHC-stabilized cobalt half-sandwich complexes
Source: Royal Society of Chemistry journal article supplement (doi:10.1039/d0nj06137a), 2021-01-01
Supplement: d0nj06137a1.pdf [file d0nj06137a1.pdf]

Electronic Supplementary Information

***C–F Bond Activation of perfluorinated arenes at NHC-stabilized Cobalt  
Halfsandwich Complexes***

Daniel Ertler, Maximilian W. Kuntze-Fechner, Simon Dürr, Katharina Lubitz, and Udo  
Radius\*

Institut für Anorganische Chemie, Julius-Maximilians-Universität Würzburg, Am Hubland, D-  
97074 Würzburg, Germany.

E-mail: u.radius@uni-wuerzburg.de

The Supporting Information contents:

1. Additional Figures and Tables
2. NMR-Spectra

## 1. Additional Figures and Tables

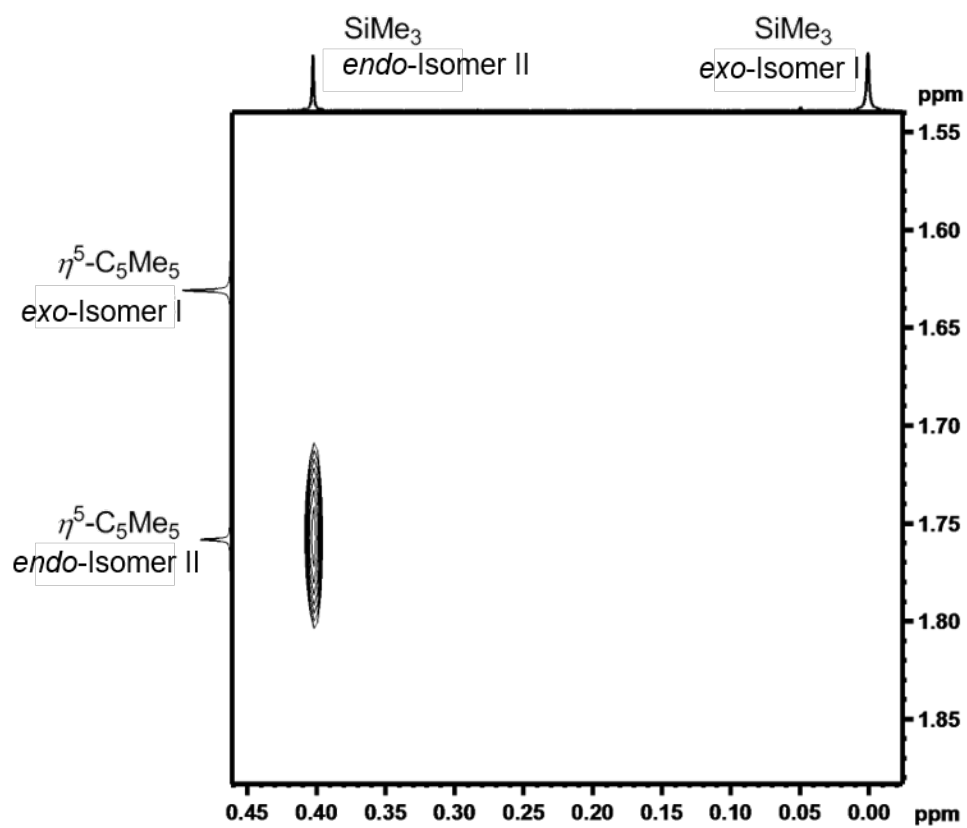

**Figure S1:** Section of the  $^1\text{H}$ - $^1\text{H}$ -NOESY correlation spectrum of the mixture of isomers of  $[\text{Cp}^*\text{Co}(i\text{Pr}_2\text{Im})(\eta^2\text{-C}_2\text{H}_3(\text{SiMe}_3))]$  **6**.

**Table S1:** Selected NMR spectroscopic data of the complexes **1 - 6**.

|          | <sup>1</sup> H NMR [ppm]                                      |                                                 |                                                           | <sup>13</sup> C{ <sup>1</sup> H} NMR [ppm]     |
|----------|---------------------------------------------------------------|-------------------------------------------------|-----------------------------------------------------------|------------------------------------------------|
|          | Cp-H (s)                                                      | C <sub>2</sub> H <sub>4</sub>                   | NCHCHN (s)                                                | Cp                                             |
| <b>1</b> | 4.59                                                          | 0.91<br>2.54                                    | Me <sub>2</sub> Im: 5.93                                  | 80.6                                           |
| <b>2</b> | 4.68                                                          | 1.11<br>2.57                                    | <i>i</i> Pr <sub>2</sub> Im: 6.20                         | 80.5                                           |
|          |                                                               | C <sub>2</sub> H <sub>3</sub> SiCH <sub>3</sub> |                                                           |                                                |
| <b>3</b> | 4.61                                                          | 0.35                                            | Me <sub>2</sub> Im: 5.90                                  | 80.2                                           |
| <b>4</b> | 4.72                                                          | 0.35                                            | <i>i</i> Pr <sub>2</sub> Im: 6.20                         | 80.1                                           |
|          | Cp-CH <sub>3</sub> (s)                                        |                                                 |                                                           | C <sub>5</sub> (CH <sub>3</sub> ) <sub>5</sub> |
| <b>5</b> | 1.61                                                          | -0.07                                           | Me <sub>2</sub> Im: 6.07<br>6.11                          | 88.2                                           |
| <b>6</b> | <i>exo</i> - <b>6</b> : 1.64<br><i>endo</i> - <b>6</b> : 1.77 | 0.00<br>0.41                                    | <i>i</i> Pr <sub>2</sub> Im: 6.26<br>6.35<br>6.13<br>6.26 | 88.3<br>88.5                                   |

**Table S2:** Selected bond lengths (Å) and angles (°) of the complexes **2, 4, and 6 - 11**.

|           | d Co-C1  | d Co-C <sub>5</sub> R <sub>5</sub> | d Co-L                                                          | ∠ C1-Co-C <sub>5</sub> R <sub>5</sub> | ∠ C1-Co-L                                                       |
|-----------|----------|------------------------------------|-----------------------------------------------------------------|---------------------------------------|-----------------------------------------------------------------|
| <b>2</b>  | 1.891(2) | R = H:<br>1.713(3)                 | L = C <sub>2</sub> H <sub>4</sub><br>1.866(3)                   | R = H:<br>130.43(1)                   | L = C <sub>2</sub> H <sub>4</sub><br>93.04(1)                   |
| <b>4</b>  | 1.892(2) | R = H:<br>1.714(1)                 | L = C <sub>2</sub> H <sub>3</sub> SiMe <sub>3</sub><br>1.867(1) | R = H:<br>129.03(6)                   | L = C <sub>2</sub> H <sub>3</sub> SiMe <sub>3</sub><br>92.03(5) |
| <b>6</b>  | 1.926(2) | R = Me:<br>1.814(2)                | L = C <sub>2</sub> H <sub>3</sub> SiMe <sub>3</sub><br>1.882(2) | R = Me:<br>128.87(7)                  | L = C <sub>2</sub> H <sub>3</sub> SiMe <sub>3</sub><br>97.41(8) |
| <b>7</b>  | 1.928(2) | R = H:<br>1.714(2)                 | L = C <sub>6</sub> F <sub>5</sub><br>1.951(1)                   | R = H:<br>132.03(6)                   | L = C <sub>6</sub> F <sub>5</sub><br>96.60(7)                   |
| <b>8</b>  | 1.992(4) | R = H:<br>1.781(2)                 | L = C <sub>7</sub> F <sub>7</sub><br>1.994(4)                   | R = H:<br>131.19(6)                   | L = C <sub>7</sub> F <sub>7</sub><br>95.02(1)                   |
| <b>9</b>  | 1.922(2) | R = H:<br>1.721(6)                 | L = C <sub>12</sub> F <sub>9</sub><br>1.952(2)                  | R = H:<br>132.99(4)                   | L = C <sub>12</sub> F <sub>9</sub><br>93.80(7)                  |
| <b>10</b> | 1.897(3) | R = Me:<br>1.690(2)                | L = C <sub>6</sub> F <sub>5</sub><br>1.939(4)                   | R = Me:<br>133.71(6)                  | L = C <sub>6</sub> F <sub>5</sub><br>97.65(1)                   |
| <b>11</b> | 1.937(3) | R = Me:<br>1.720(9)                | L = C <sub>7</sub> F <sub>7</sub><br>1.946(4)                   | R = Me:<br>135.20(1)                  | L = C <sub>7</sub> F <sub>7</sub><br>95.11(1)                   |

**Table S3:** Selected NMR spectroscopic data of the dinuclear complexes **13** - **16**.

|           | <sup>1</sup> H NMR [ppm] |                                                                                   | <sup>13</sup> C{ <sup>1</sup> H} NMR [ppm] | <sup>19</sup> F NMR [ppm]                                                  |
|-----------|--------------------------|-----------------------------------------------------------------------------------|--------------------------------------------|----------------------------------------------------------------------------|
|           | Cp- <i>H</i> (s)         | NCHCHN (s)                                                                        | Cp                                         | Ar- <i>F</i>                                                               |
| <b>13</b> | 4.69 (10 H)              | Me <sub>2</sub> Im: 6.01 (2 H)<br>Me <sub>2</sub> Im: 6.09 (2 H)                  | 84.9                                       | -145.2<br>-159.2<br>-194.3                                                 |
| <b>14</b> | 4.82 (10 H)              | <i>i</i> Pr <sub>2</sub> Im: 6.32 (2 H)<br>6.45 (2 H)                             | 84.8                                       | -142.4<br>-158.5<br>-192.7                                                 |
| <b>15</b> | 4.67 (5 H)<br>4.67 (5 H) | Me <sub>2</sub> Im: 5.99 (2 H)<br>6.07 (1 H)<br>6.09 (1 H)                        | 85.0<br>85.3                               | -55.1 (CF <sub>3</sub> )<br>-119.2<br>-145.4<br>-185.2<br>-200.3           |
| <b>16</b> | 4.79 (5 H)<br>4.79 (5 H) | <i>i</i> Pr <sub>2</sub> Im: 6.31 (1 H)<br>6.32 (1 H)<br>6.42 (1 H)<br>6.43 (1 H) | 84.8<br>85.0                               | -55.6 (CF <sub>3</sub> )<br>-118.4<br>-142.1<br>-142.9<br>-183.8<br>-198.8 |

**Table S4:** Selected bond lengths (Å) and angles (°) of the **13**, **14**, **16**, **18** and **19**.

|           | d Co-C1  | d Co-Cp  | d Co-Ar <sup>F</sup> | ∠ C1-Co-Cp | ∠ C1-Co-Ar <sup>F</sup> | ∠ Cp-Co-Ar <sup>F</sup> |
|-----------|----------|----------|----------------------|------------|-------------------------|-------------------------|
| <b>13</b> | 1.905(4) | 1.724(4) | 1.809(4)             | 124.70(7)  | 91.4.90(7)              | 140.34(8)               |
| <b>14</b> | 1.905(6) | 1.738(4) | 1.813(5)             | 124.58(9)  | 95.11(2)                | 140.30(9)               |
| <b>16</b> | 1.911(2) | 1.734(2) | 1.813(3)             | 123.28(9)  | 95.86(9)                | 140.86(1)               |
| <b>18</b> | 1.911(3) | 1.731(1) | 1.812(2)             | 125.91(4)  | 94.17(3)                | 139.92(4)               |
| <b>19</b> | 1.915(3) | 1.725(3) | 1.808(3)             | 123.90(7)  | 94.07(8)                | 142.01(5)               |

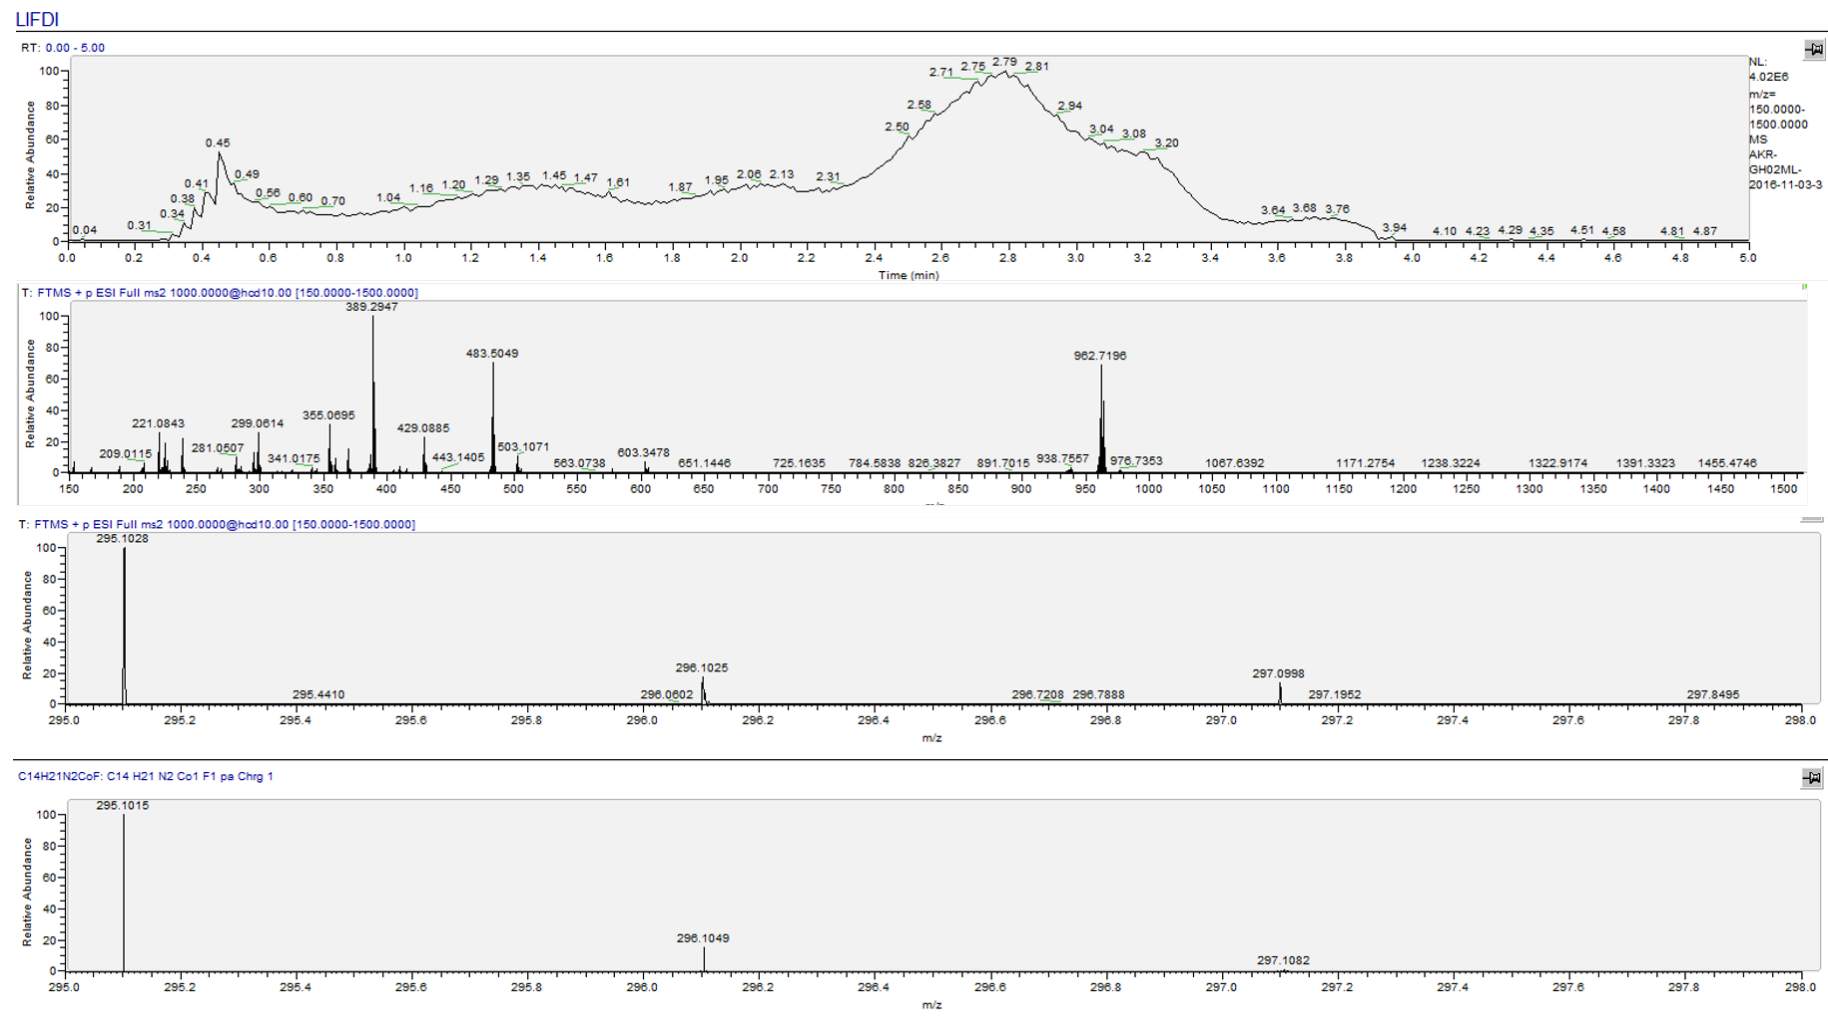

**Figure S2:** Mass spectrum of the reaction mixture of the conversion of  $[\text{CpCo}(\text{iPr}_2\text{Im})(\eta^2\text{-C}_2\text{H}_4)]$  **2** with hexafluorobenzene after 24 h at 100°C. The signal of the cobaltfluoride complex  $[\text{CpCo}(\text{iPr}_2\text{Im})(\text{F})]$  (calcd.  $[\text{M}/z]^+$ : 295.1021, found: 295.1015) is zoomed in.

## 2. NMR-Spectra

[CpCo(Me<sub>2</sub>Im)(η<sup>2</sup>-C<sub>2</sub>H<sub>4</sub>)] **1**

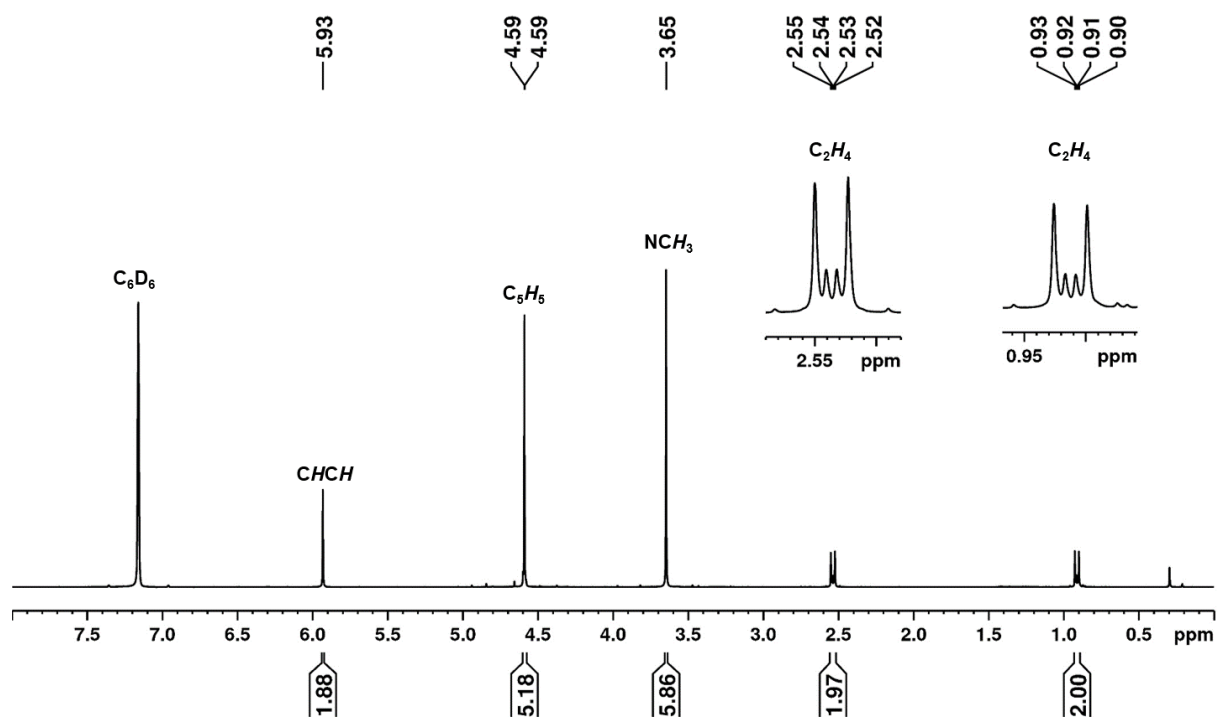

Figure S3: <sup>1</sup>H NMR spectrum of complex [CpCo(Me<sub>2</sub>Im)(η<sup>2</sup>-C<sub>2</sub>H<sub>4</sub>)] **1** in C<sub>6</sub>D<sub>6</sub>.

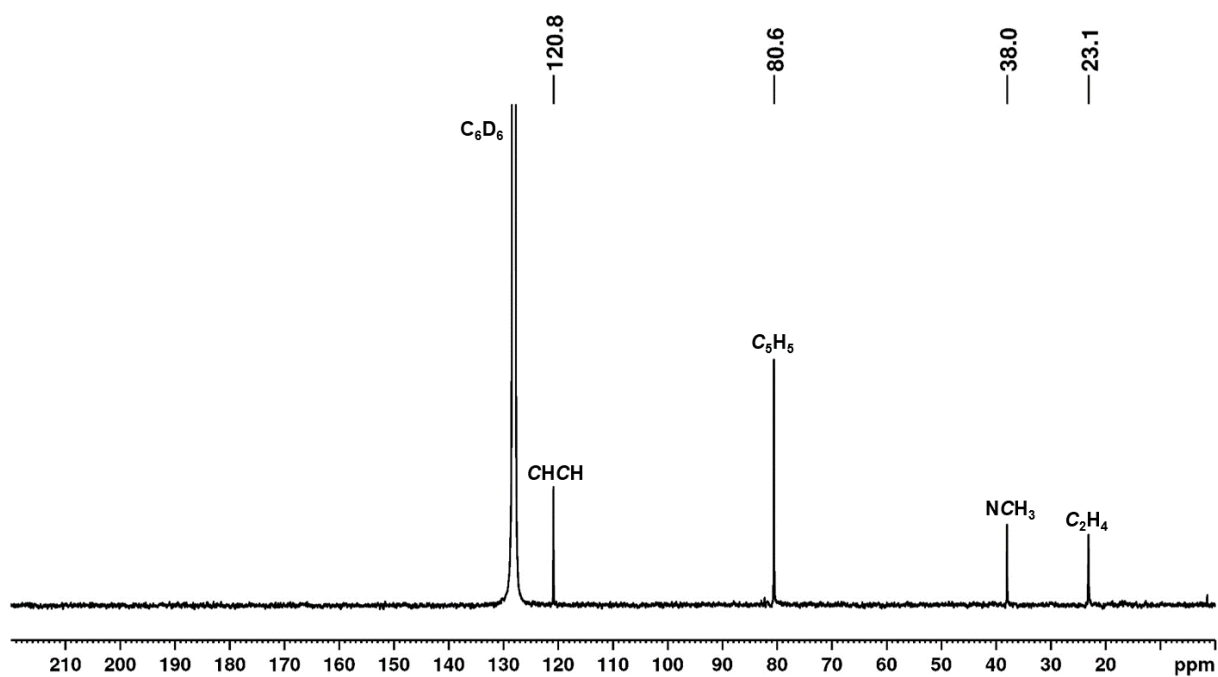

Figure S4: <sup>13</sup>C{<sup>1</sup>H} NMR spectrum of complex [CpCo(Me<sub>2</sub>Im)(η<sup>2</sup>-C<sub>2</sub>H<sub>4</sub>)] **1** in C<sub>6</sub>D<sub>6</sub>.

**[CpCo(*i*Pr<sub>2</sub>Im)( $\eta^2$ -C<sub>2</sub>H<sub>4</sub>)] 2**

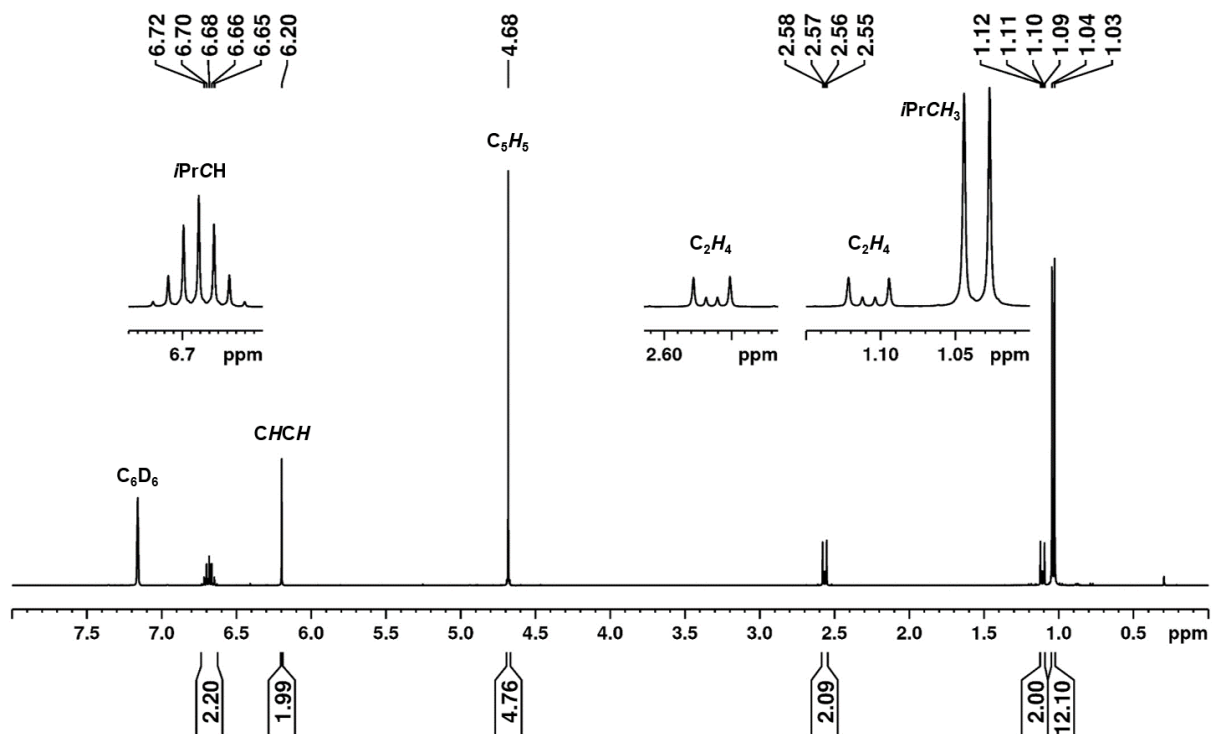

**Figure S5:** <sup>1</sup>H NMR spectrum of complex [CpCo(*i*Pr<sub>2</sub>Im)( $\eta^2$ -C<sub>2</sub>H<sub>4</sub>)] 2 in C<sub>6</sub>D<sub>6</sub>.

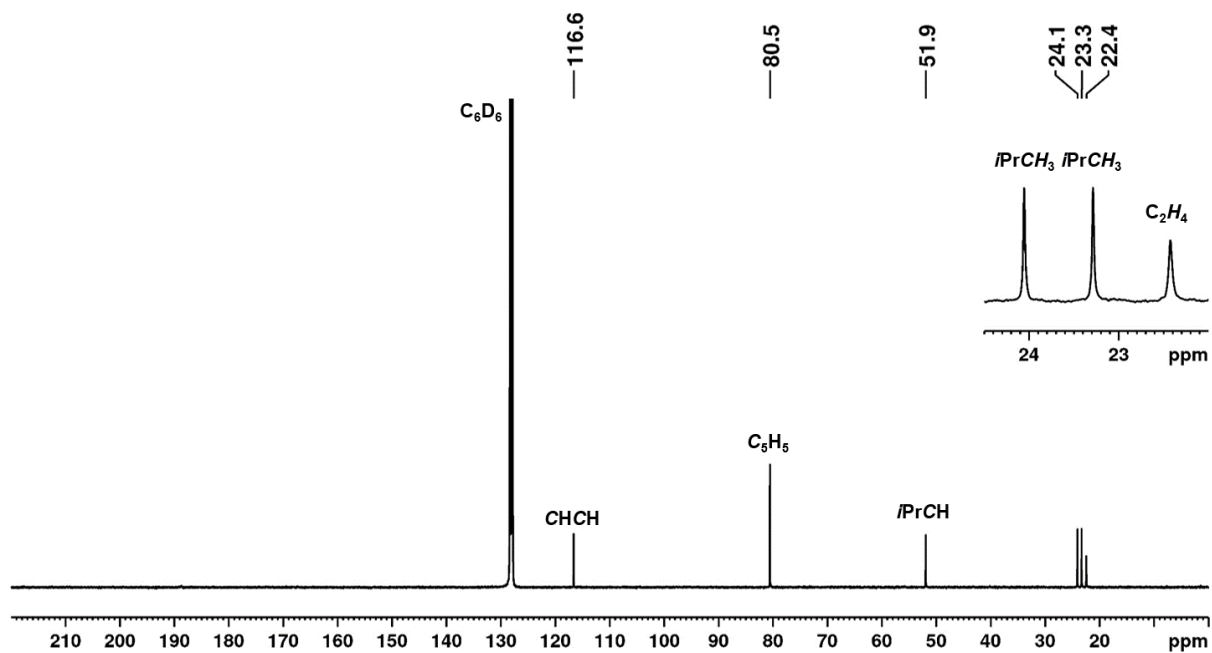

**Figure S6:** <sup>13</sup>C{<sup>1</sup>H} NMR spectrum of complex [CpCo(*i*Pr<sub>2</sub>Im)( $\eta^2$ -C<sub>2</sub>H<sub>4</sub>)] 2 in C<sub>6</sub>D<sub>6</sub>.

**[CpCo(Me<sub>2</sub>Im)(η<sup>2</sup>-C<sub>2</sub>H<sub>3</sub>(SiMe<sub>3</sub>)) 3**

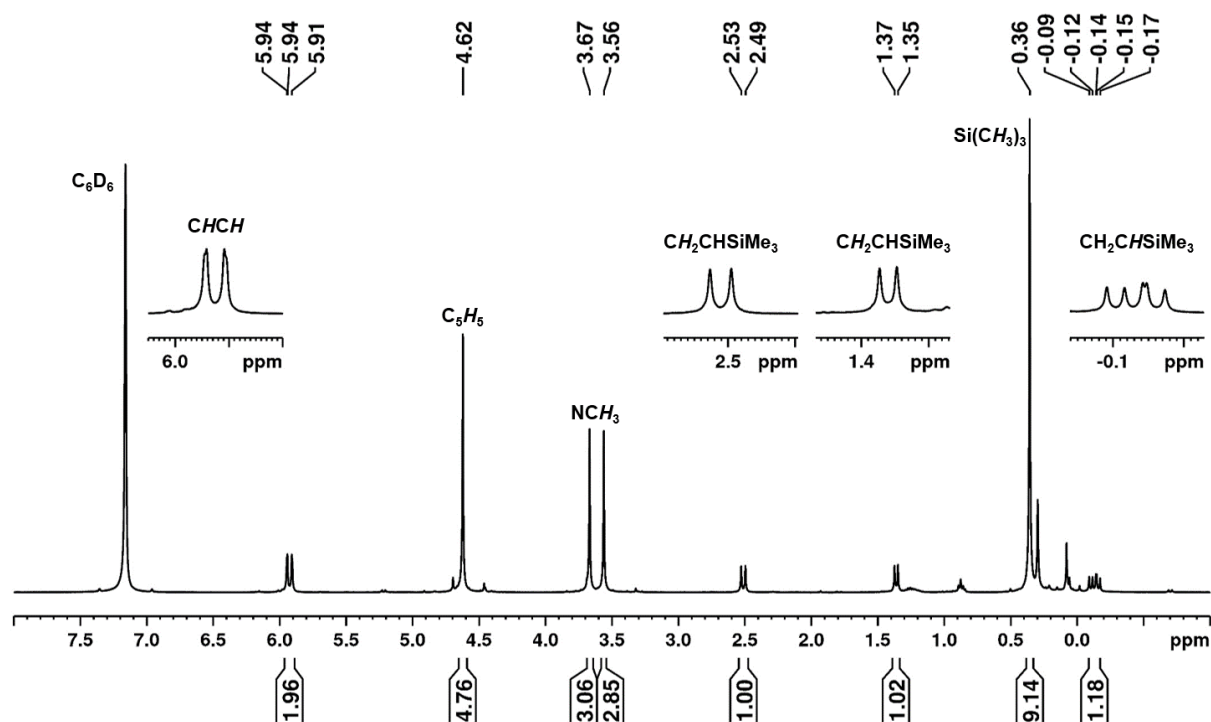

**Figure S7:** <sup>1</sup>H NMR spectrum of complex [CpCo(Me<sub>2</sub>Im)(η<sup>2</sup>-C<sub>2</sub>H<sub>3</sub>(SiMe<sub>3</sub>)) 3 in C<sub>6</sub>D<sub>6</sub>.

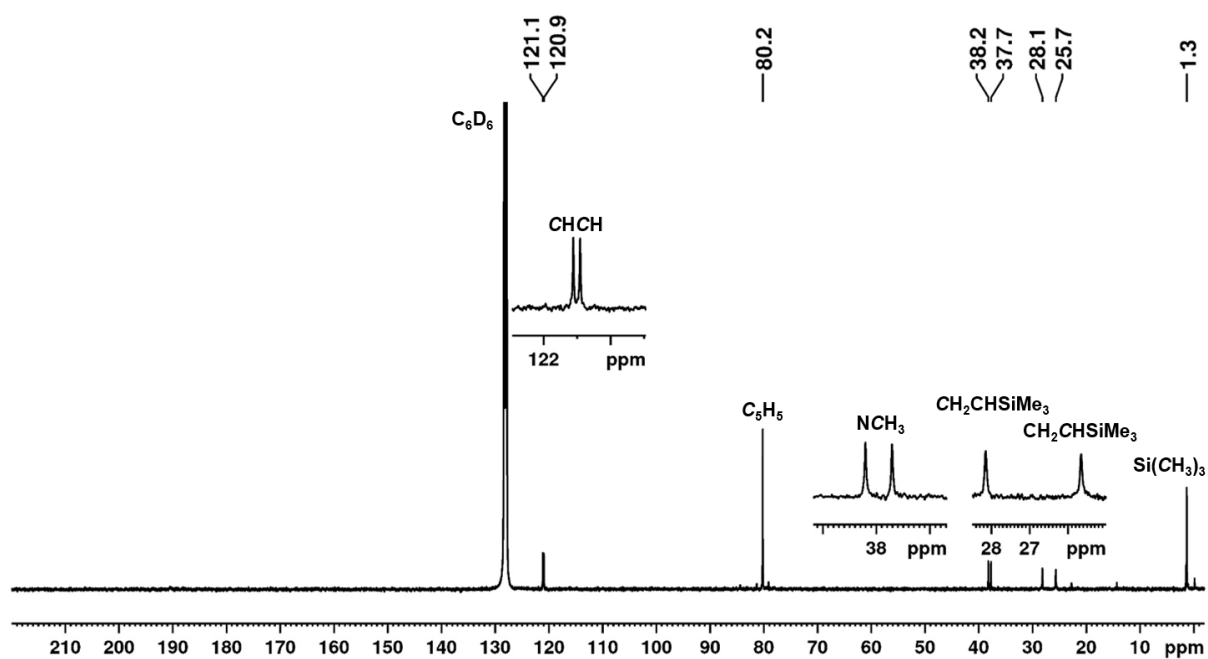

**Figure S8:** <sup>13</sup>C{<sup>1</sup>H} NMR spectrum of complex [CpCo(Me<sub>2</sub>Im)(η<sup>2</sup>-C<sub>2</sub>H<sub>3</sub>(SiMe<sub>3</sub>)) 3 in C<sub>6</sub>D<sub>6</sub>.



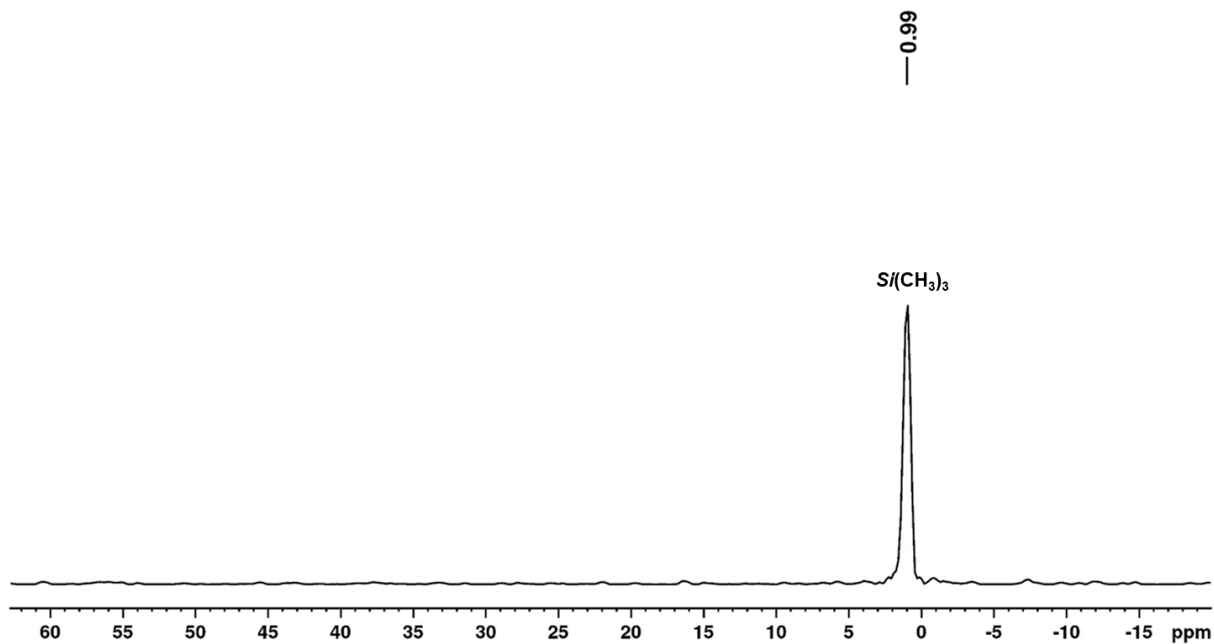

**Figure S9:**  $^{29}\text{Si}$  NMR spectrum of complex  $[\text{CpCo}(\text{Me}_2\text{Im})(\eta^2\text{-C}_2\text{H}_3(\text{SiMe}_3))]$  **3** in  $\text{C}_6\text{D}_6$ .

**$[\text{CpCo}(i\text{Pr}_2\text{Im})(\eta^2\text{-C}_2\text{H}_3(\text{SiMe}_3))]$  **4****

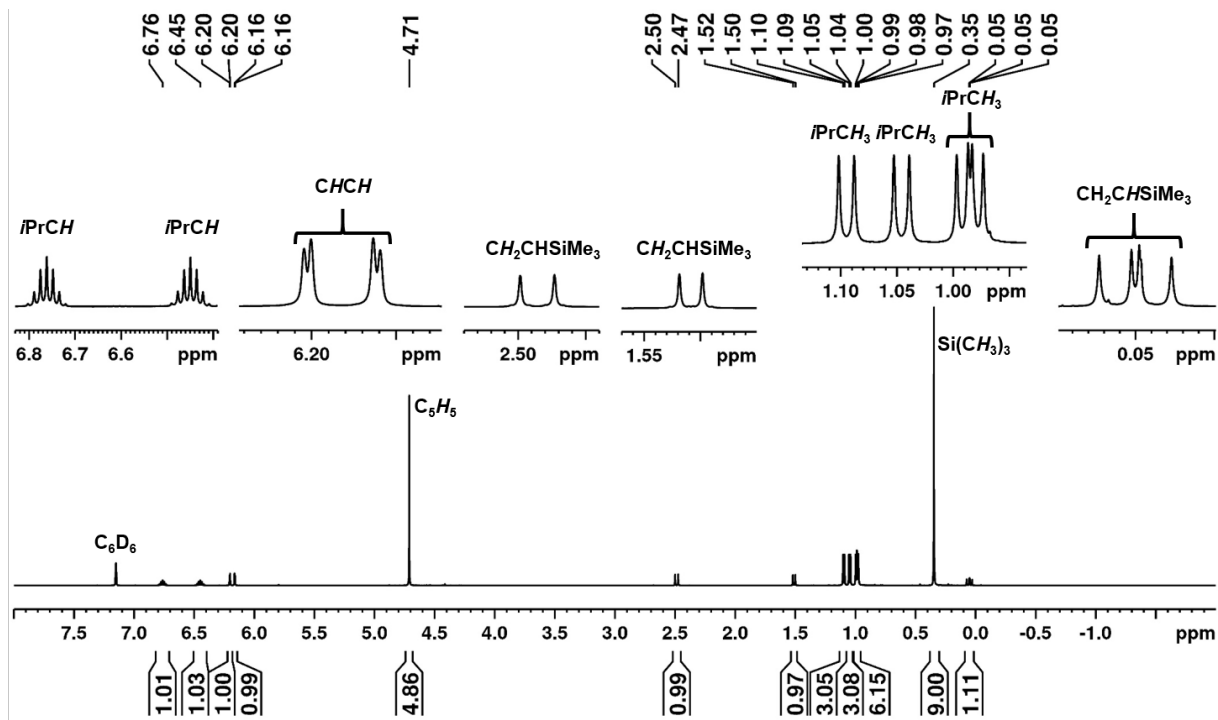

**Figure S10:**  $^1\text{H}$  NMR spectrum of complex  $[\text{CpCo}(i\text{Pr}_2\text{Im})(\eta^2\text{-C}_2\text{H}_3(\text{SiMe}_3))]$  **4** in  $\text{C}_6\text{D}_6$ .

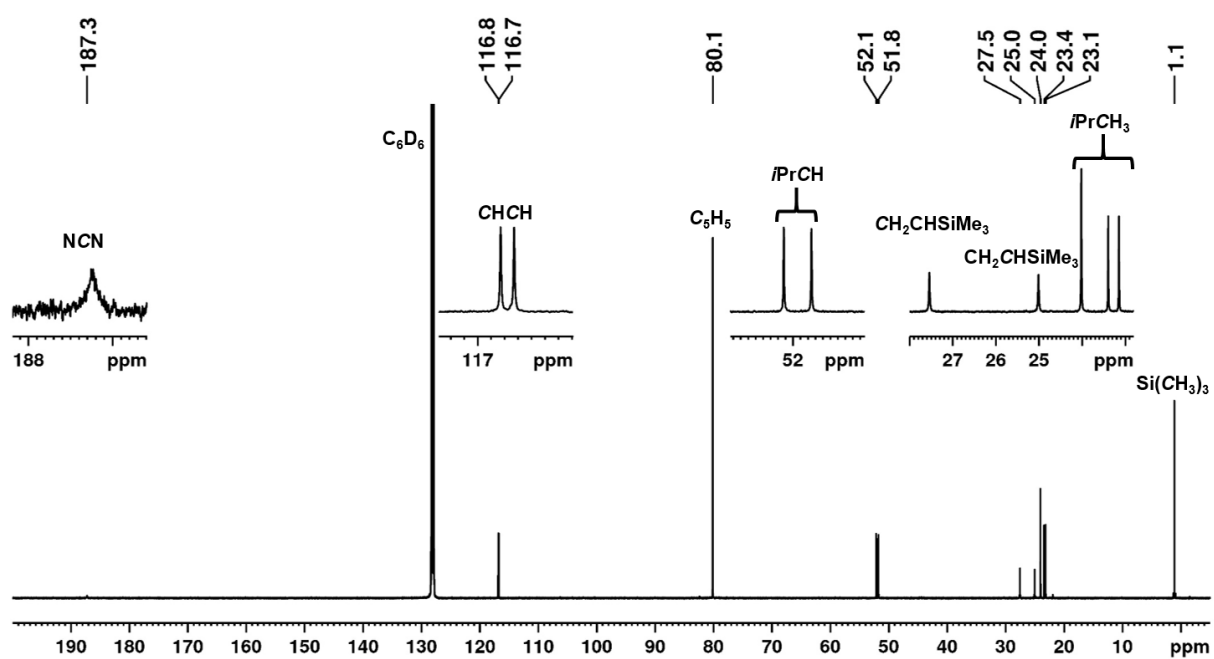

**Figure S11:**  $^{13}\text{C}\{^1\text{H}\}$  NMR spectrum of complex  $[\text{CpCo}(\text{iPr}_2\text{Im})(\eta^2\text{-C}_2\text{H}_3(\text{SiMe}_3))]$  **4** in  $\text{C}_6\text{D}_6$ .

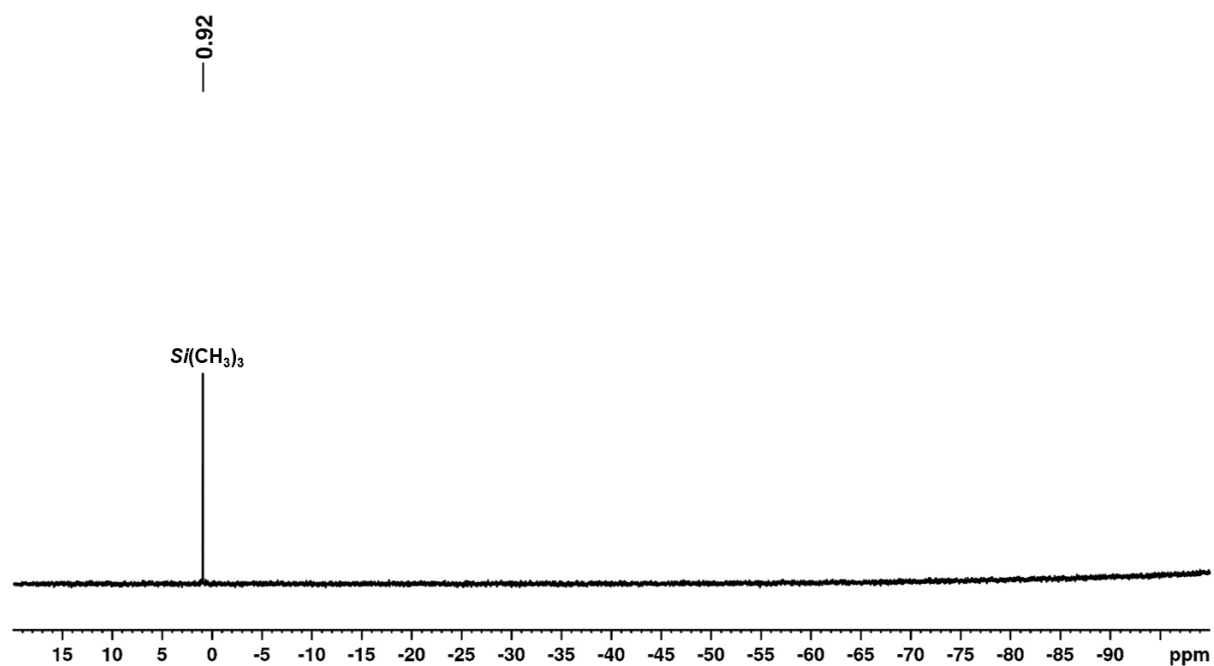

**Figure S12:**  $^{29}\text{Si}$  NMR spectrum of complex  $[\text{CpCo}(\text{iPr}_2\text{Im})(\eta^2\text{-C}_2\text{H}_3(\text{SiMe}_3))]$  **4** in  $\text{C}_6\text{D}_6$ .

**[Cp\*Co(Me<sub>2</sub>Im){η<sup>2</sup>-C<sub>2</sub>H<sub>3</sub>(SiMe<sub>3</sub>)}] 5**

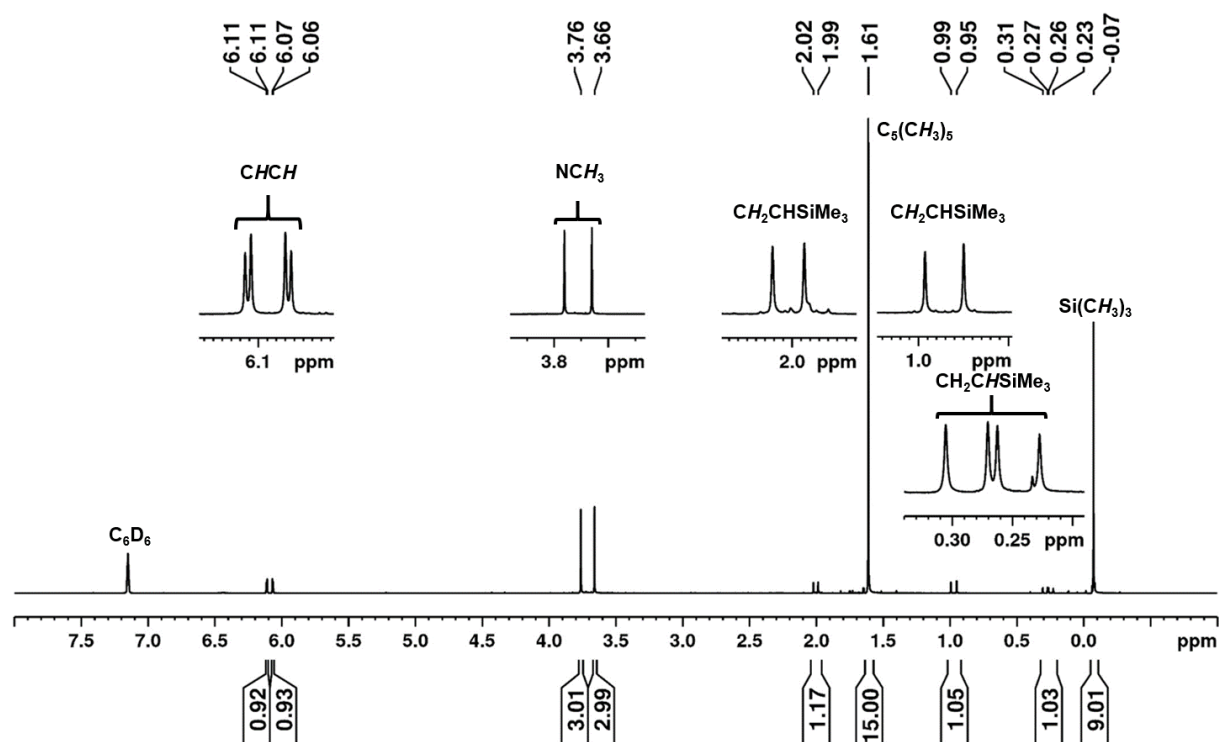

**Figure S13:** <sup>1</sup>H NMR spectrum of complex [Cp\*Co(Me<sub>2</sub>Im)(η<sup>2</sup>-C<sub>2</sub>H<sub>3</sub>(SiMe<sub>3</sub>))] **5** in C<sub>6</sub>D<sub>6</sub>.

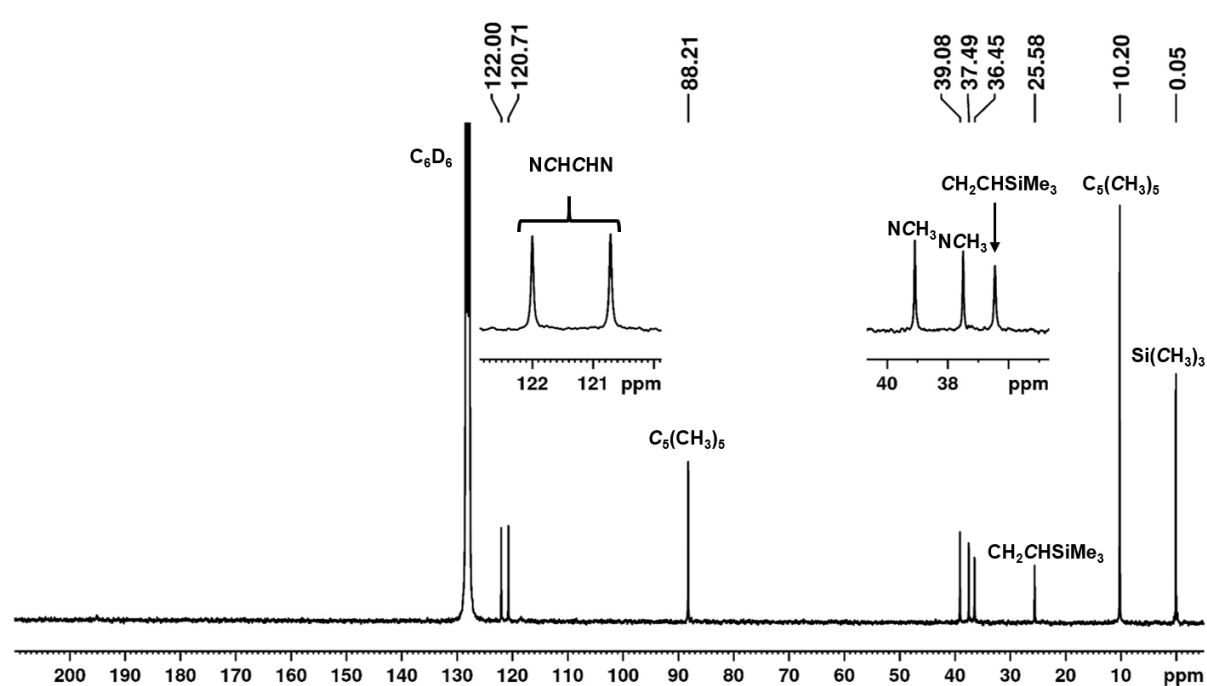

**Figure S14:** <sup>13</sup>C{<sup>1</sup>H} NMR spectrum of complex [Cp\*Co(Me<sub>2</sub>Im)(η<sup>2</sup>-C<sub>2</sub>H<sub>3</sub>(SiMe<sub>3</sub>))] **5** in C<sub>6</sub>D<sub>6</sub>.

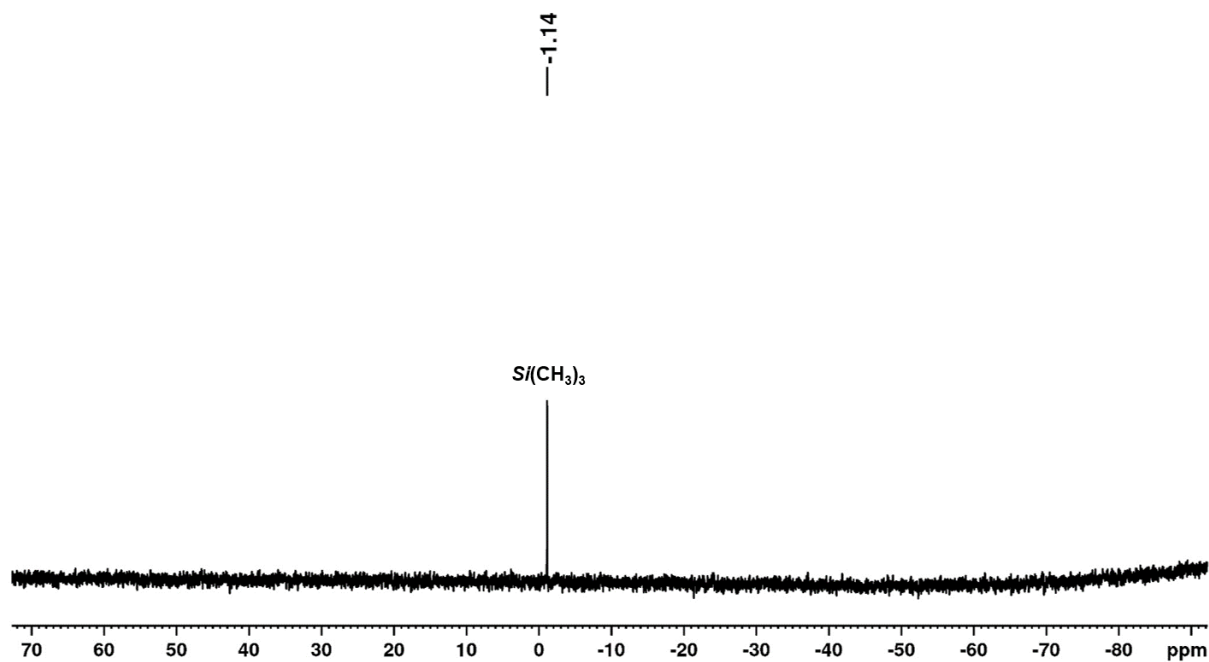

**Figure S15:** <sup>29</sup>Si NMR spectrum of complex [Cp\*Co(Me<sub>2</sub>Im)(η<sup>2</sup>-C<sub>2</sub>H<sub>3</sub>(SiMe<sub>3</sub>))] **5** in C<sub>6</sub>D<sub>6</sub>.

**[Cp\*Co(*i*Pr<sub>2</sub>Im)(η<sup>2</sup>-C<sub>2</sub>H<sub>3</sub>(SiMe<sub>3</sub>))] **6****

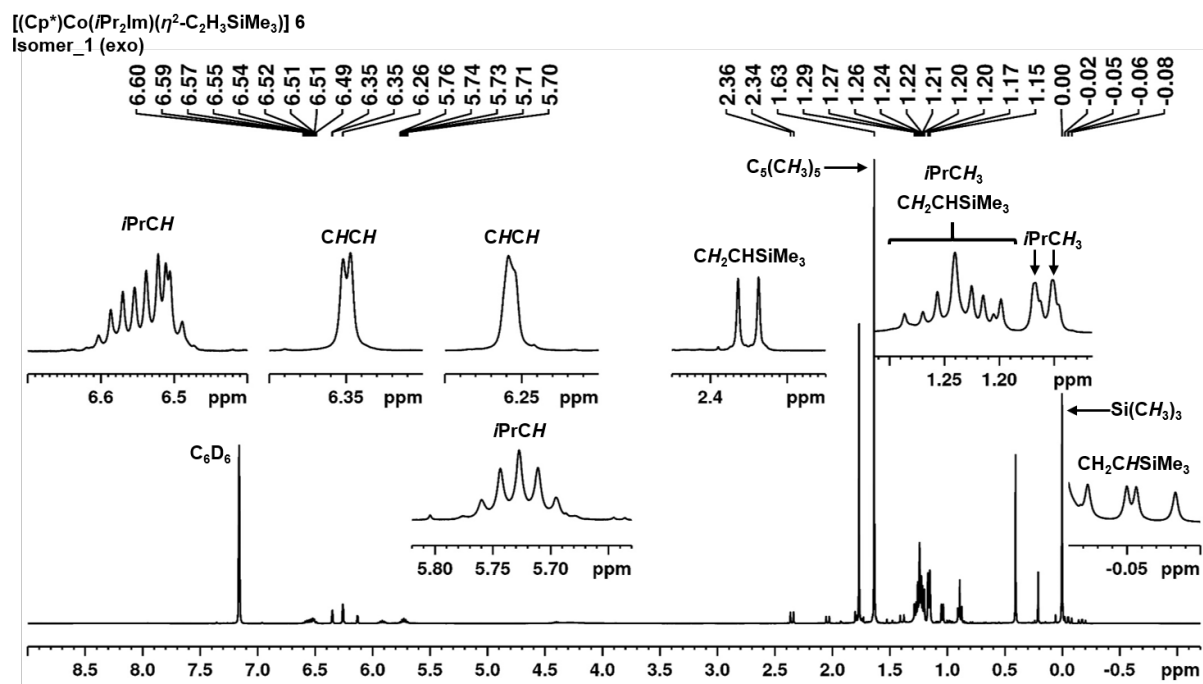

**Figure S16:** <sup>1</sup>H NMR spectrum of isomer mixture of complex [Cp\*Co(*i*Pr<sub>2</sub>Im)(η<sup>2</sup>-C<sub>2</sub>H<sub>3</sub>(SiMe<sub>3</sub>))] **6** in C<sub>6</sub>D<sub>6</sub> (isomer I is marked).

[[Cp\*Co(*i*Pr<sub>2</sub>Im)(η<sup>2</sup>-C<sub>2</sub>H<sub>3</sub>SiMe<sub>3</sub>)] 6  
Isomer\_2 (endo)

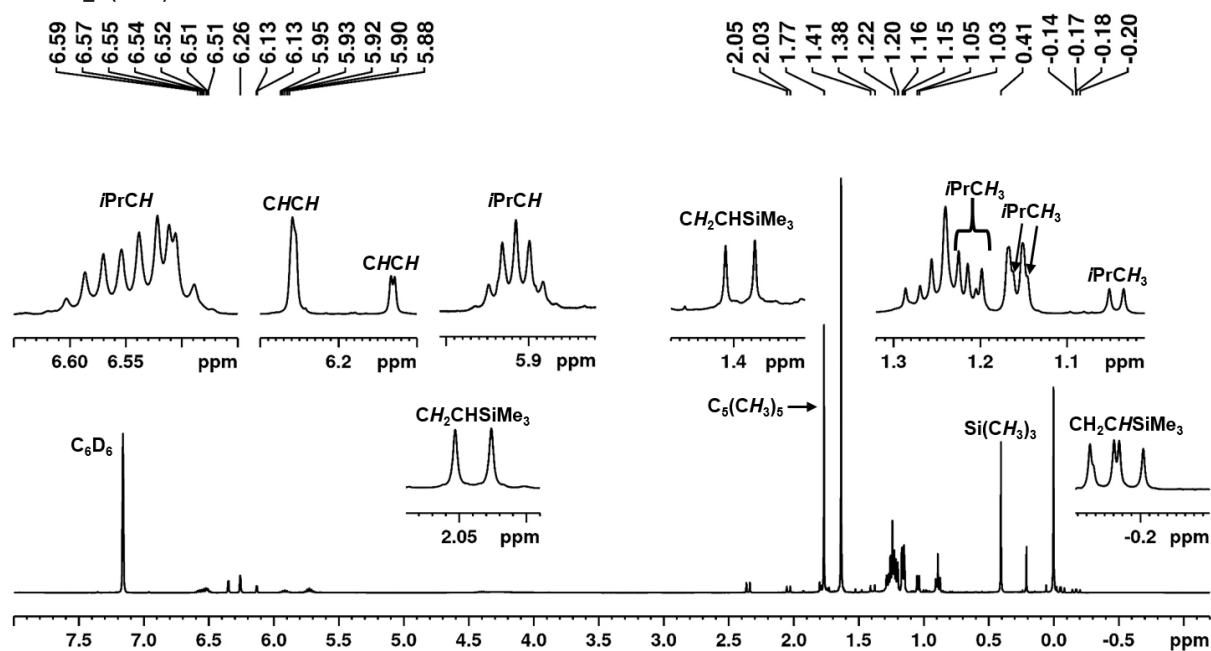

**Figure S17:** <sup>1</sup>H NMR spectrum of isomer mixture of complex [Cp\*Co(*i*Pr<sub>2</sub>Im)(η<sup>2</sup>-C<sub>2</sub>H<sub>3</sub>(SiMe<sub>3</sub>))] **6** in C<sub>6</sub>D<sub>6</sub> (isomer II is marked).

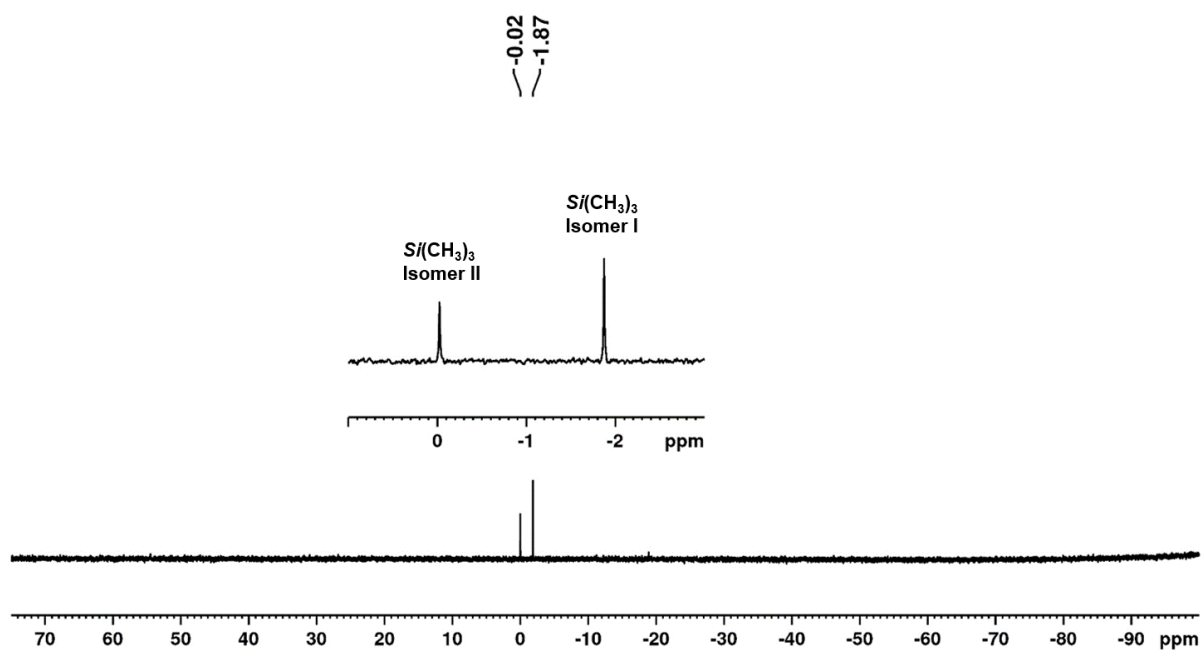

**Figure S18:** <sup>29</sup>Si NMR (99.4 MHz) spectrum of isomer mixture of complex [Cp\*Co(*i*Pr<sub>2</sub>Im)(η<sup>2</sup>-C<sub>2</sub>H<sub>3</sub>(SiMe<sub>3</sub>))] **6** in C<sub>6</sub>D<sub>6</sub>.

**[{CpCo(Me<sub>2</sub>Im)}<sub>2</sub>(η<sup>2</sup>,η<sup>2</sup>-C<sub>6</sub>F<sub>6</sub>)] 13**

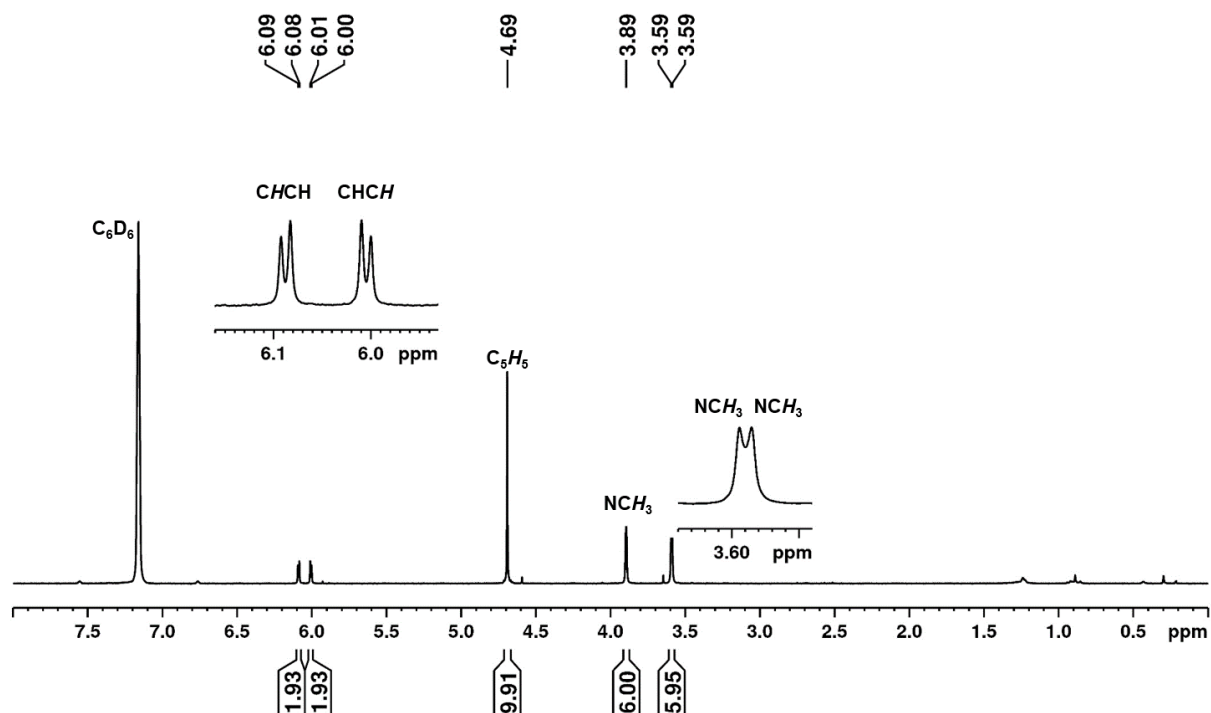

**Figure S19:** <sup>1</sup>H NMR spectrum of complex [{CpCo(Me<sub>2</sub>Im)}<sub>2</sub>(η<sup>2</sup>,η<sup>2</sup>-C<sub>6</sub>F<sub>6</sub>)] **13** in C<sub>6</sub>D<sub>6</sub>.

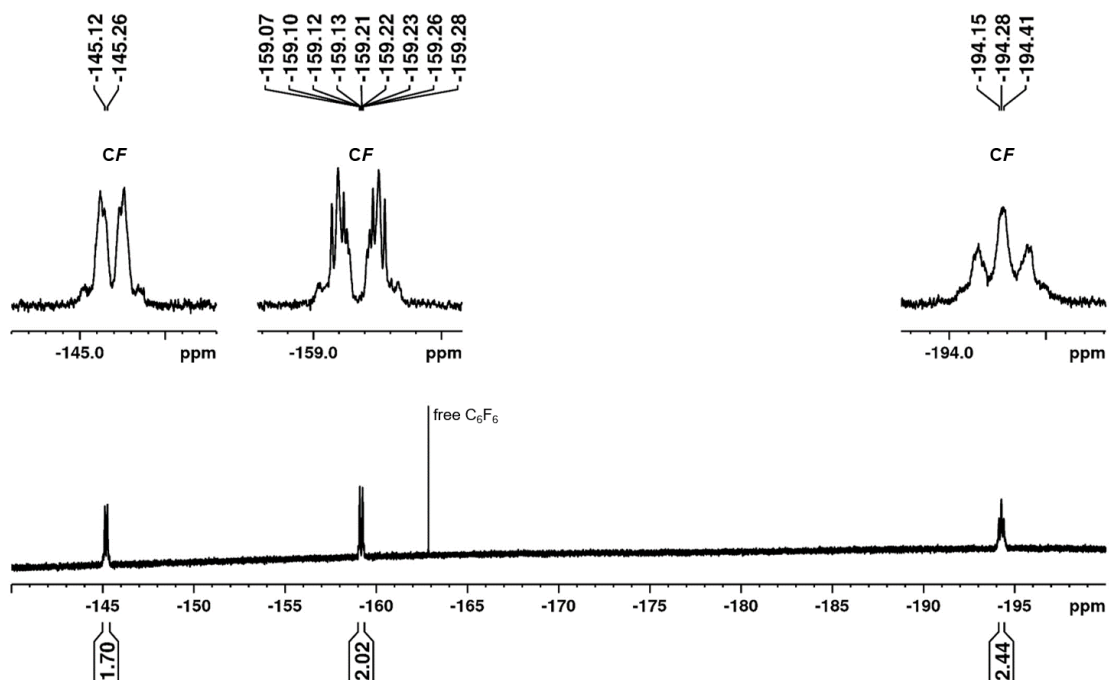

**Figure S20:** <sup>19</sup>F-NMR spectrum of complex [{CpCo(Me<sub>2</sub>Im)}<sub>2</sub>(η<sup>2</sup>,η<sup>2</sup>-C<sub>6</sub>F<sub>6</sub>)] **13** in C<sub>6</sub>D<sub>6</sub>.

**[{CpCo(*i*Pr<sub>2</sub>Im)}<sub>2</sub>(η<sup>2</sup>,η<sup>2</sup>-C<sub>6</sub>F<sub>6</sub>)] **14****

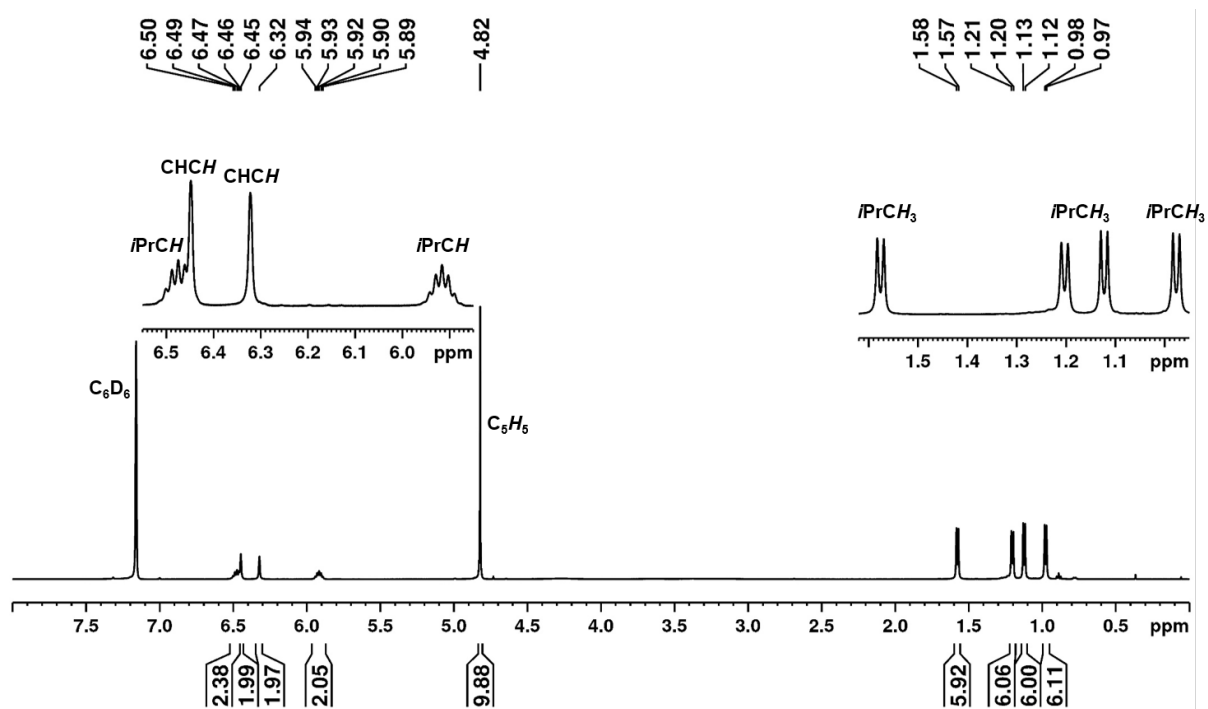

**Figure S21:** <sup>1</sup>H-NMR spectrum of complex [{CpCo(*i*Pr<sub>2</sub>Im)}<sub>2</sub>(η<sup>2</sup>,η<sup>2</sup>-C<sub>6</sub>F<sub>6</sub>)] **14** in C<sub>6</sub>D<sub>6</sub>.

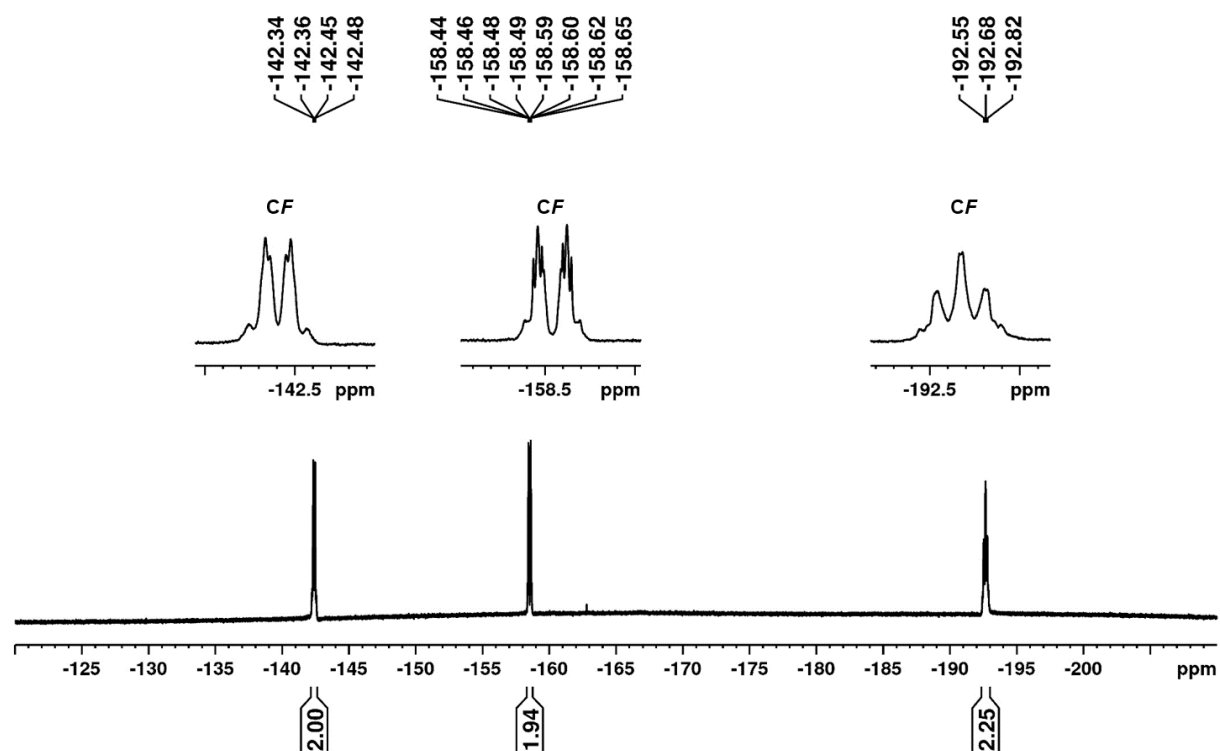

**Figure S22:** <sup>19</sup>F-NMR spectrum of complex [{CpCo(*i*Pr<sub>2</sub>Im)}<sub>2</sub>(η<sup>2</sup>,η<sup>2</sup>-C<sub>6</sub>F<sub>6</sub>)] **14** in C<sub>6</sub>D<sub>6</sub>.

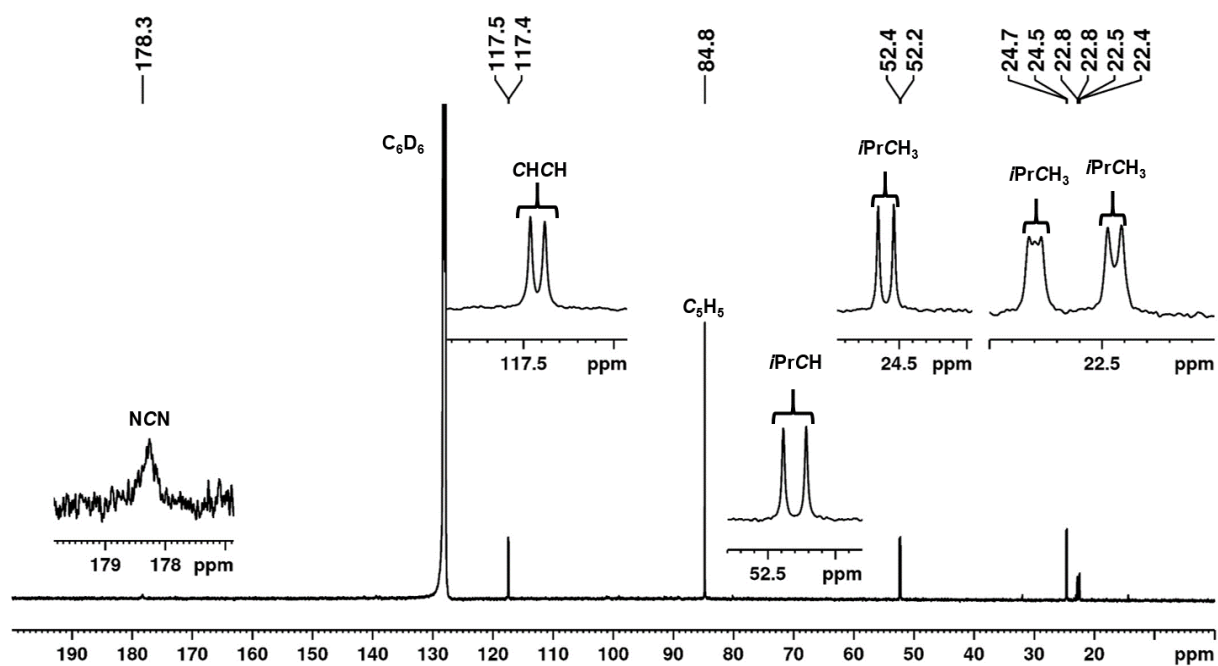

Figure S23:  $^{13}\text{C}$ -NMR spectrum of complex  $[\{\text{CpCo}(\text{iPr}_2\text{Im})\}_2(\eta^2, \eta^2\text{-C}_6\text{F}_6)]$  **14** in  $\text{C}_6\text{D}_6$ .

$[\{\text{CpCo}(\text{Me}_2\text{Im})\}_2(\eta^2, \eta^2\text{-C}_7\text{F}_8)]$  **15**

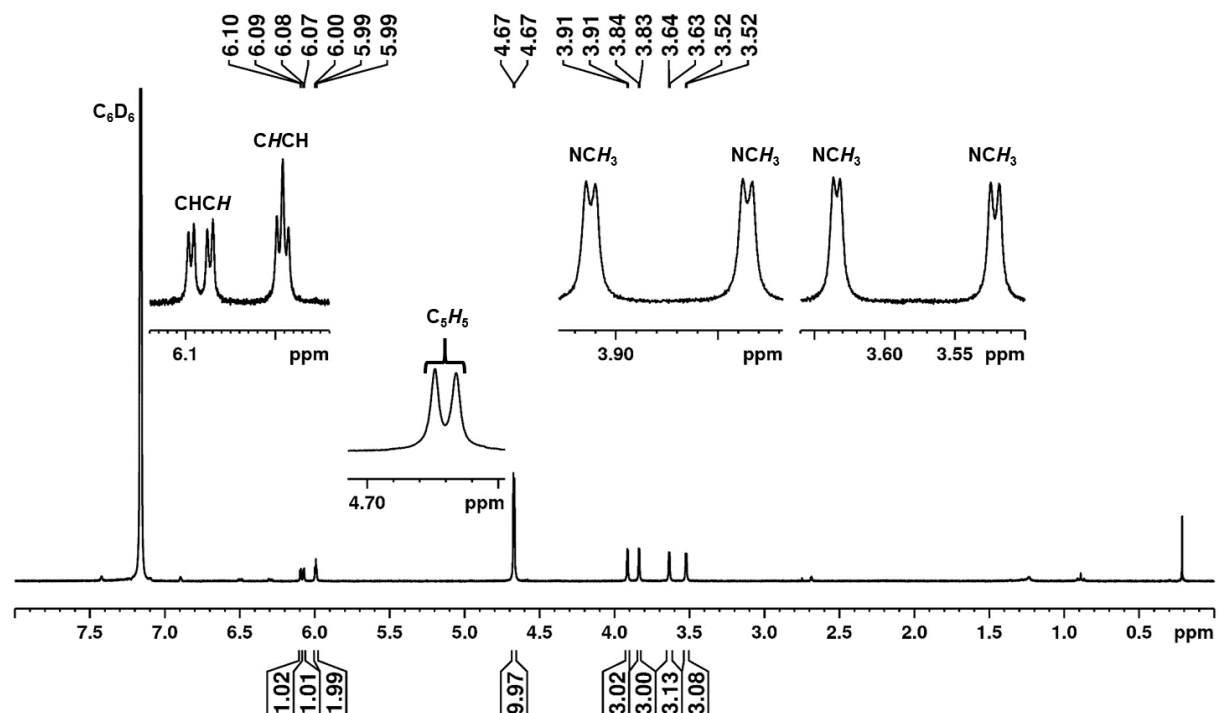

Figure S24:  $^1\text{H}$ -NMR spectrum of complex  $[\{\text{CpCo}(\text{Me}_2\text{Im})\}_2(\eta^2, \eta^2\text{-C}_7\text{F}_8)]$  **15** in  $\text{C}_6\text{D}_6$ .



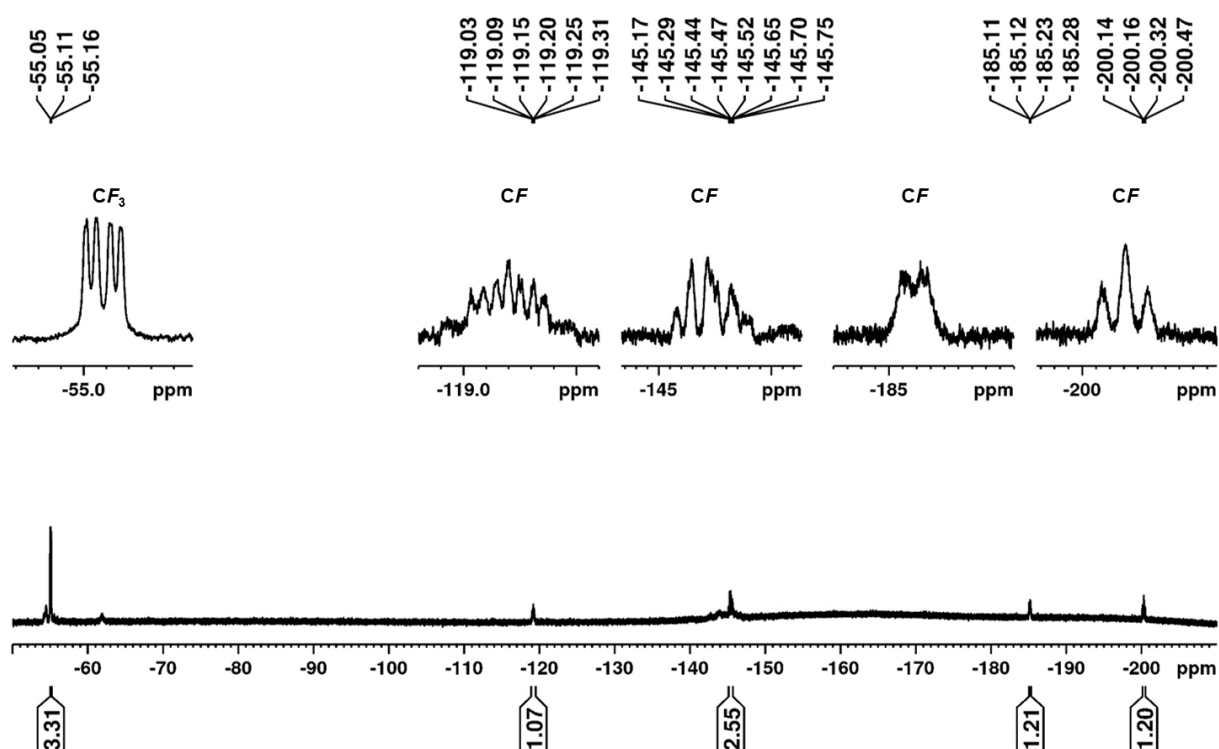

Figure S25:  $^{19}\text{F}$ -NMR spectrum of complex  $[\{\text{CpCo}(\text{Me}_2\text{Im})\}_2(\eta^2, \eta^2\text{-C}_7\text{F}_8)]$  **15** in  $\text{C}_6\text{D}_6$ .

$[\{\text{CpCo}(\text{iPr}_2\text{Im})\}_2(\eta^2, \eta^2\text{-C}_7\text{F}_8)]$  **16**

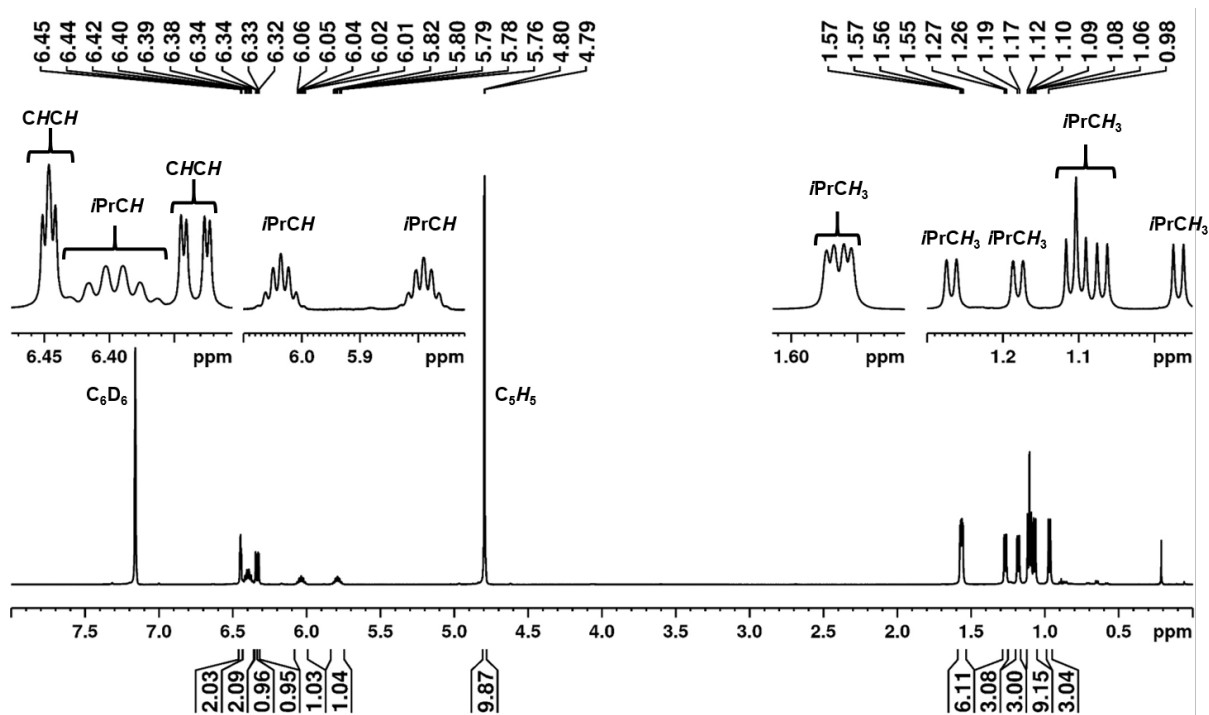

Figure S26:  $^1\text{H}$ -NMR spectrum of complex  $[\{\text{CpCo}(\text{iPr}_2\text{Im})\}_2(\eta^2, \eta^2\text{-C}_7\text{F}_8)]$  **16** in  $\text{C}_6\text{D}_6$ .

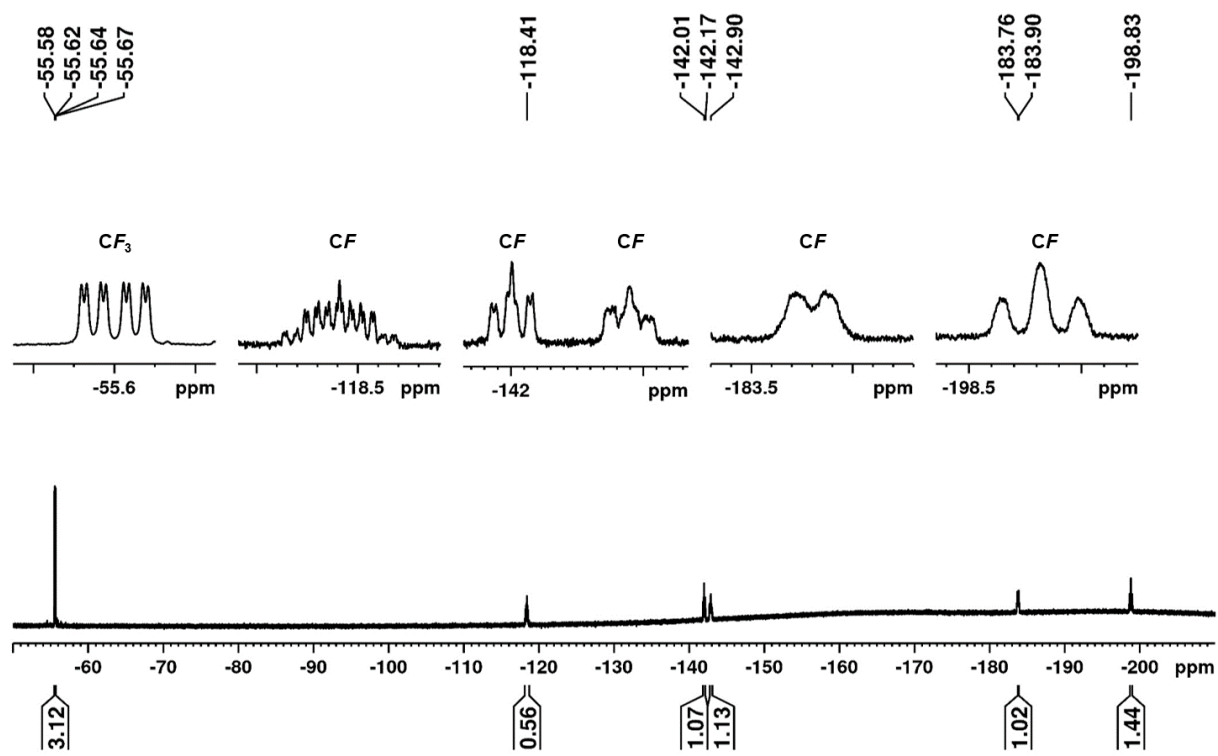

Figure S27:  $^{19}F$ -NMR spectrum of complex  $[(CpCo(iPr_2Im))_2(\eta^2, \eta^2-C_7F_8)]$  **16** in  $C_6D_6$ .

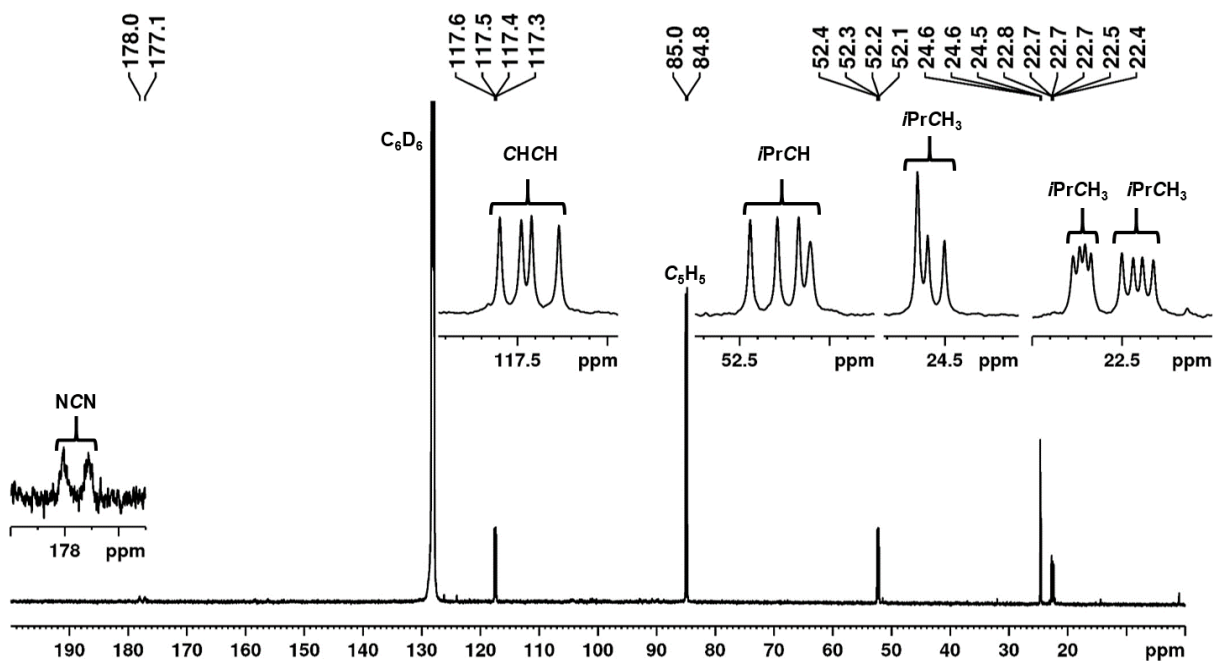

Figure S28:  $^{13}C$ -NMR spectrum of complex  $[(CpCo(iPr_2Im))_2(\eta^2, \eta^2-C_7F_8)]$  **16** in  $C_6D_6$ .

**[[CpCo(Me<sub>2</sub>Im)]<sub>2</sub>(η<sup>2</sup>,η<sup>2</sup>-C<sub>10</sub>F<sub>8</sub>)] 17**

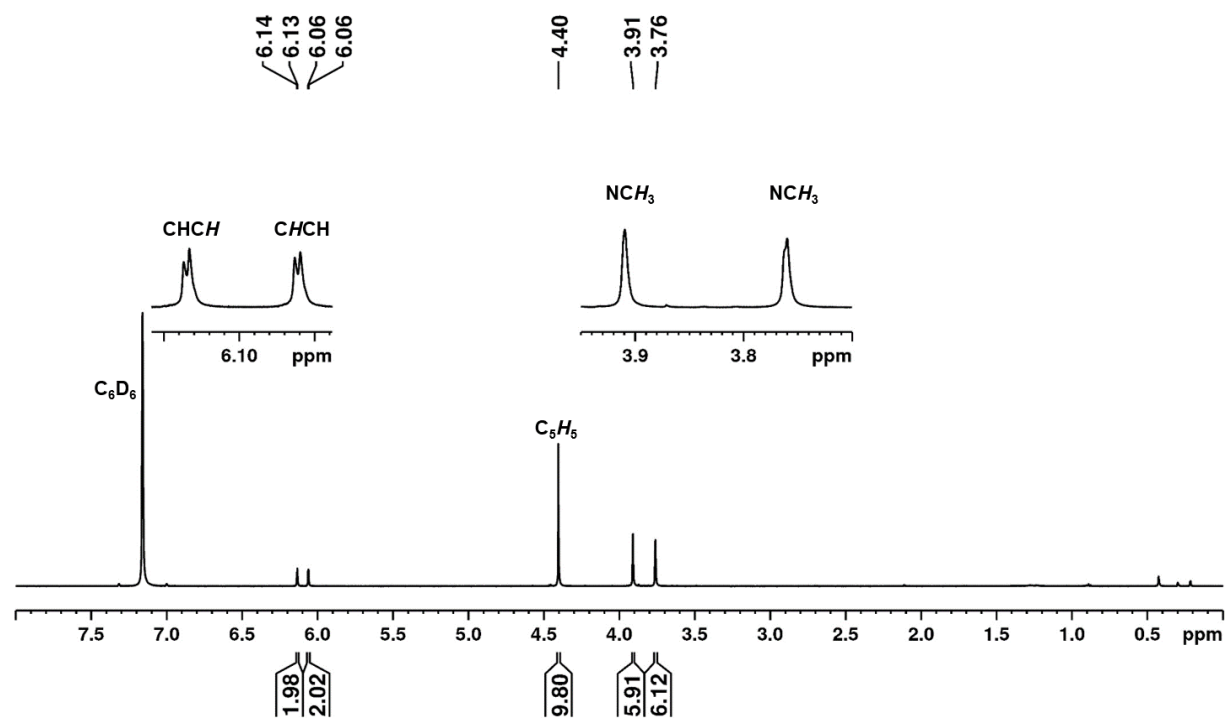

**Figure S29:** <sup>1</sup>H-NMR spectrum of complex [[CpCo(Me<sub>2</sub>Im)]<sub>2</sub>(η<sup>2</sup>,η<sup>2</sup>-C<sub>10</sub>F<sub>8</sub>)] **17** in C<sub>6</sub>D<sub>6</sub>.

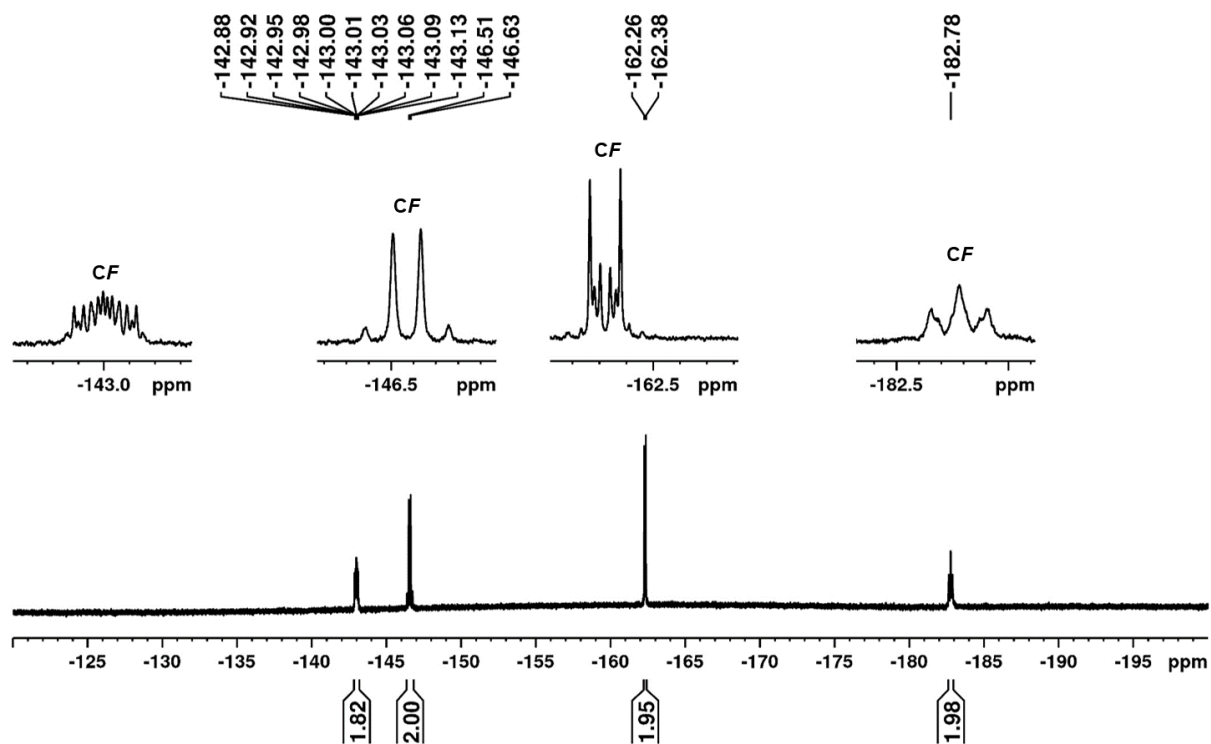

**Figure S30:** <sup>19</sup>F-NMR spectrum of complex [[CpCo(Me<sub>2</sub>Im)]<sub>2</sub>(η<sup>2</sup>,η<sup>2</sup>-C<sub>10</sub>F<sub>8</sub>)] **17** in C<sub>6</sub>D<sub>6</sub>.

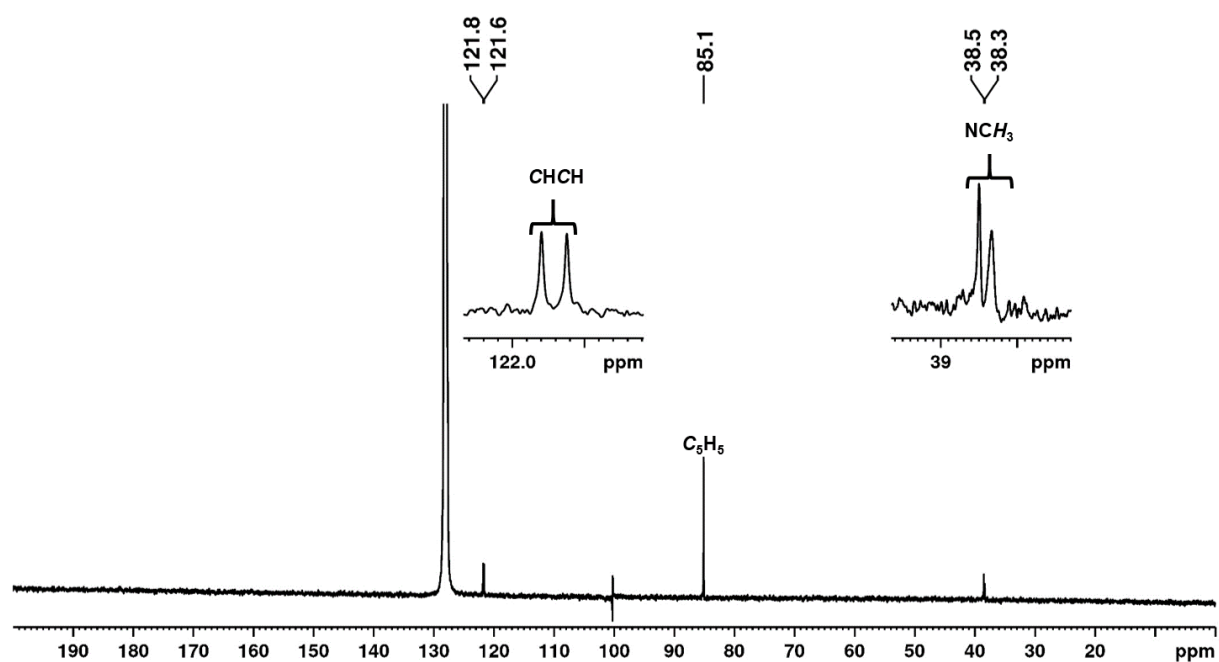

**Figure S31:**  $^{13}\text{C}$ -NMR spectrum of complex  $[\{\text{CpCo}(\text{Me}_2\text{Im})\}_2(\eta^2, \eta^2\text{-C}_{10}\text{F}_8)]$  **17** in  $\text{C}_6\text{D}_6$ .

**$[\{\text{CpCo}(i\text{Pr}_2\text{Im})\}_2(\eta^2, \eta^2\text{-C}_{10}\text{F}_8)]$  **18****

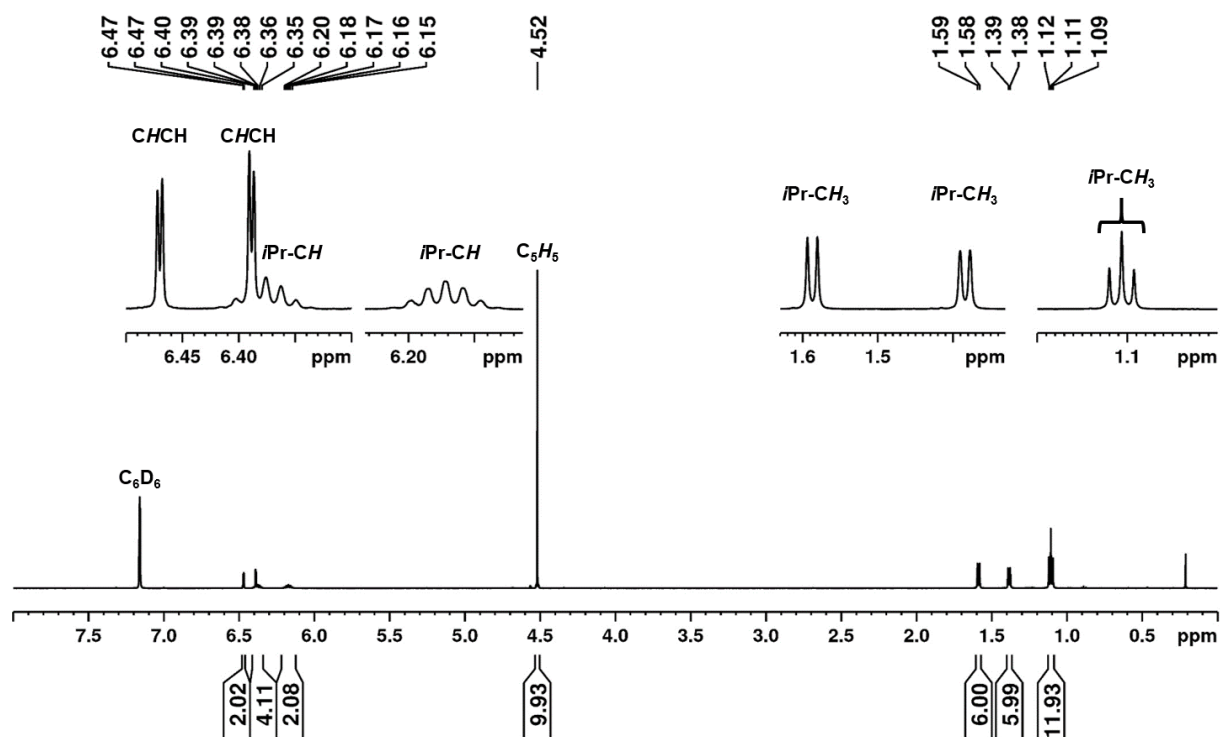

**Figure S32:**  $^1\text{H}$ -NMR spectrum of complex  $[\{\text{CpCo}(i\text{Pr}_2\text{Im})\}_2(\eta^2, \eta^2\text{-C}_{10}\text{F}_8)]$  **18** in  $\text{C}_6\text{D}_6$ .

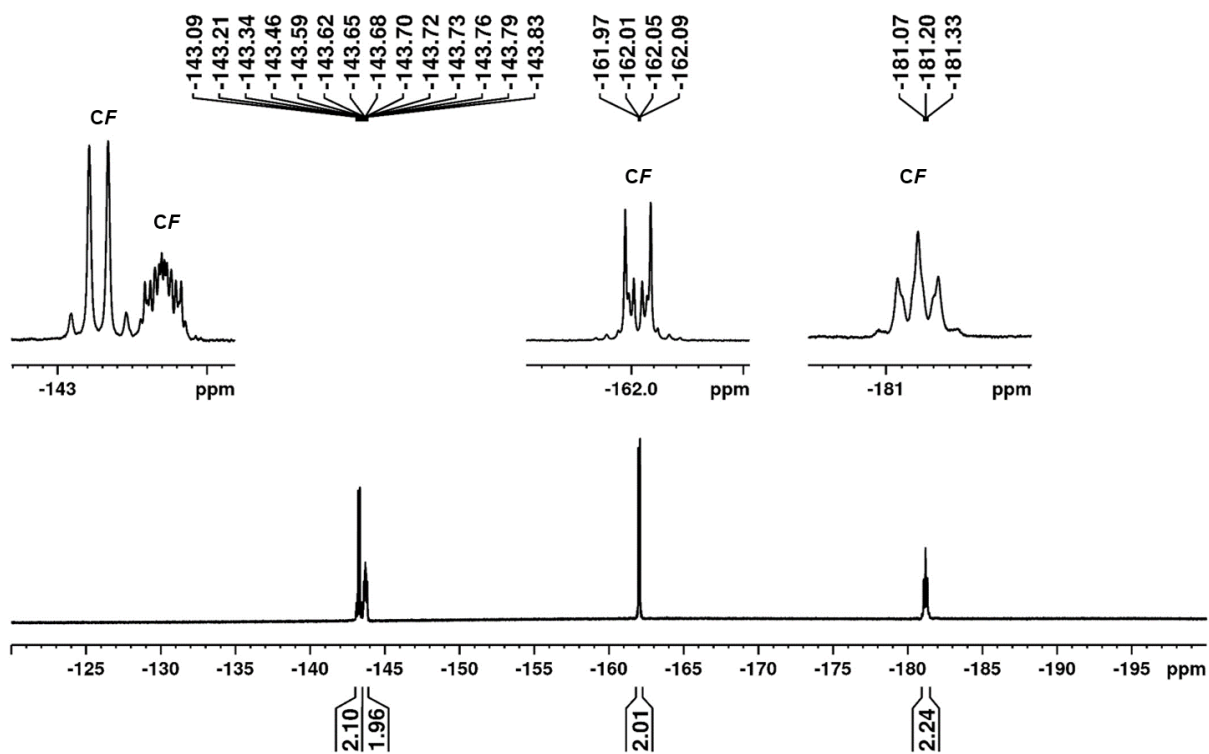

**Figure S33:**  $^{19}\text{F}$ -NMR spectrum of complex  $[\{\text{CpCo}(\text{iPr}_2\text{Im})\}_2(\eta^2, \eta^2\text{-C}_{10}\text{F}_8)]$  **18** in  $\text{C}_6\text{D}_6$ .

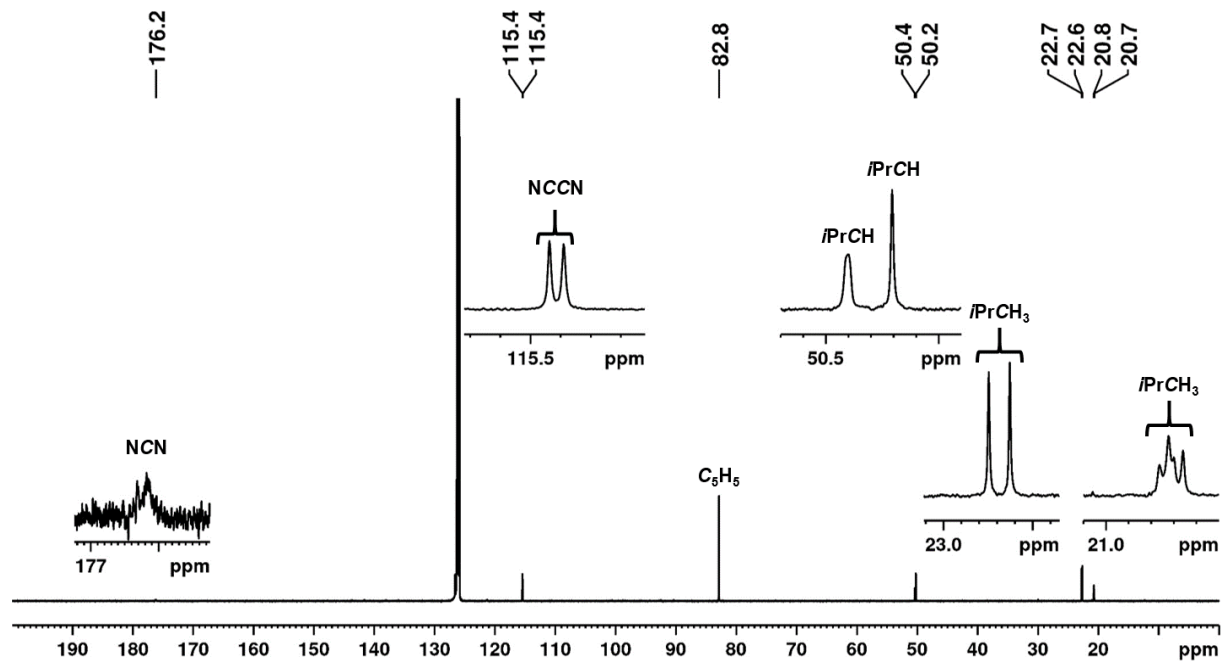

**Figure S34:**  $^{13}\text{C}$ -NMR spectrum of complex  $[\{\text{CpCo}(\text{iPr}_2\text{Im})\}_2(\eta^2, \eta^2\text{-C}_{10}\text{F}_8)]$  **18** in  $\text{C}_6\text{D}_6$ .

[CpCo(*i*Pr<sub>2</sub>Im)( $\eta^2$ -C<sub>10</sub>F<sub>8</sub>)] **19**

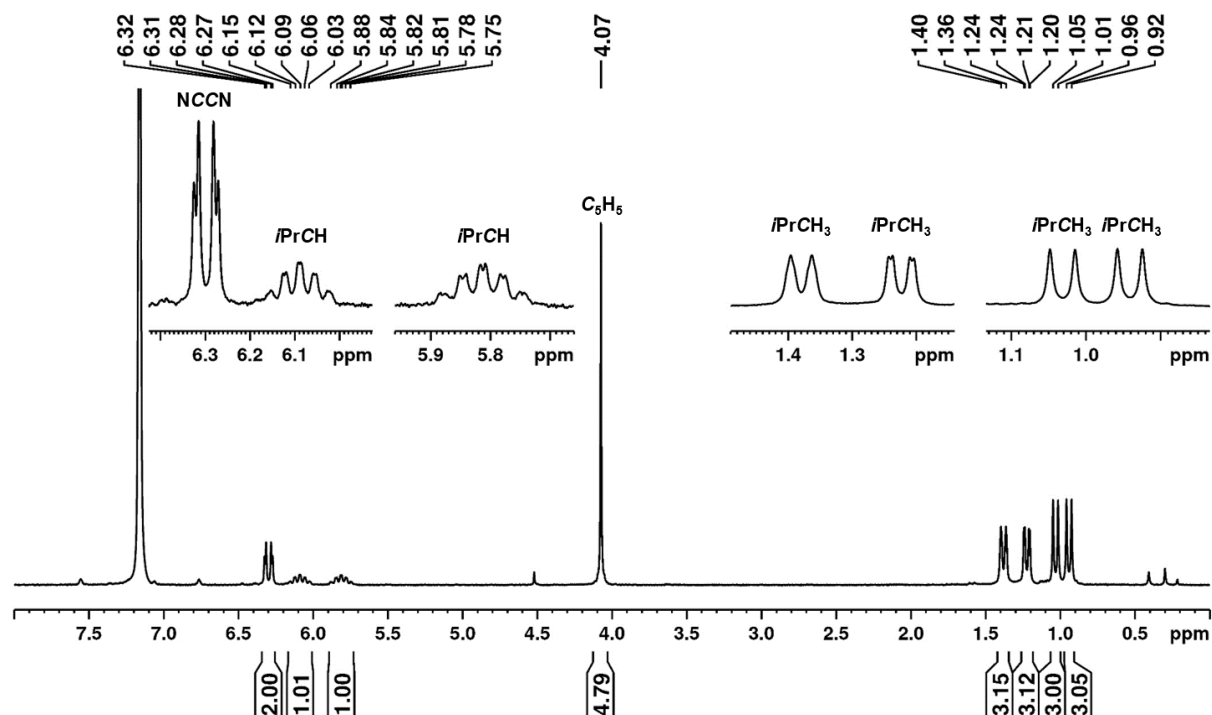

Figure S35: <sup>1</sup>H-NMR spectrum of complex [CpCo(*i*Pr<sub>2</sub>Im)( $\eta^2$ -C<sub>10</sub>F<sub>8</sub>)] **19** in C<sub>6</sub>D<sub>6</sub>.

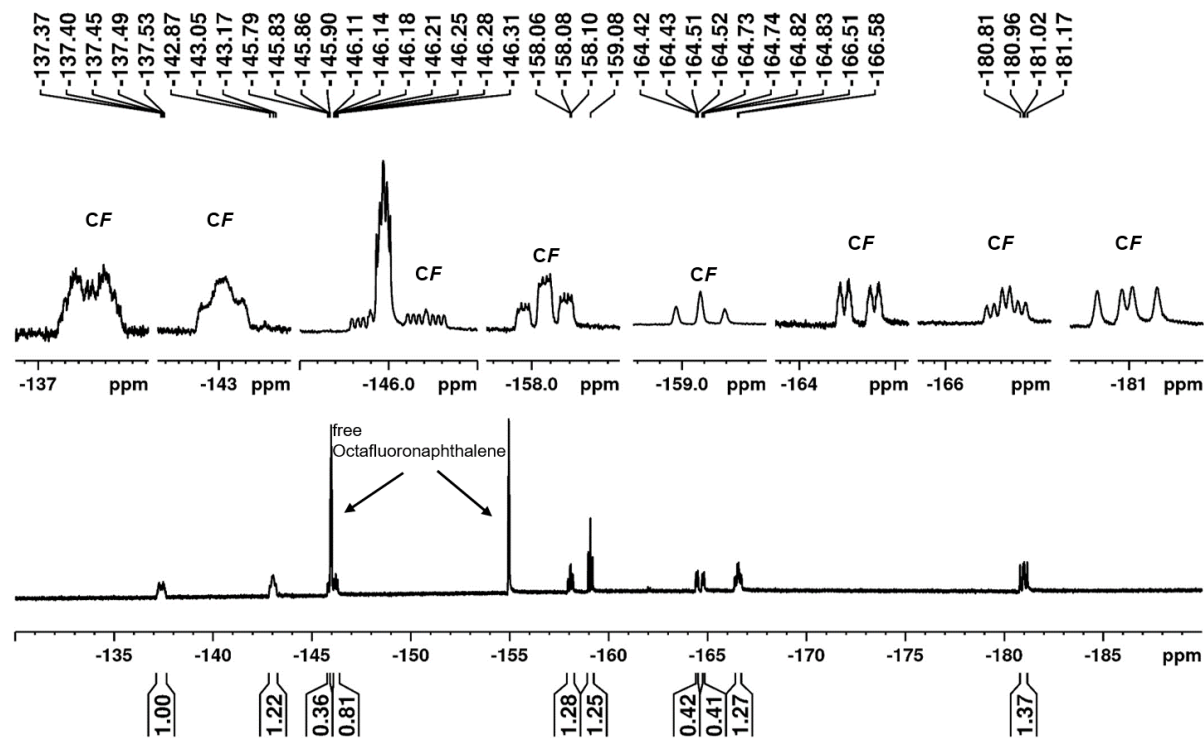

Figure S36: <sup>19</sup>F-NMR spectrum of complex [CpCo(*i*Pr<sub>2</sub>Im)( $\eta^2$ -C<sub>10</sub>F<sub>8</sub>)] **19** in C<sub>6</sub>D<sub>6</sub>.

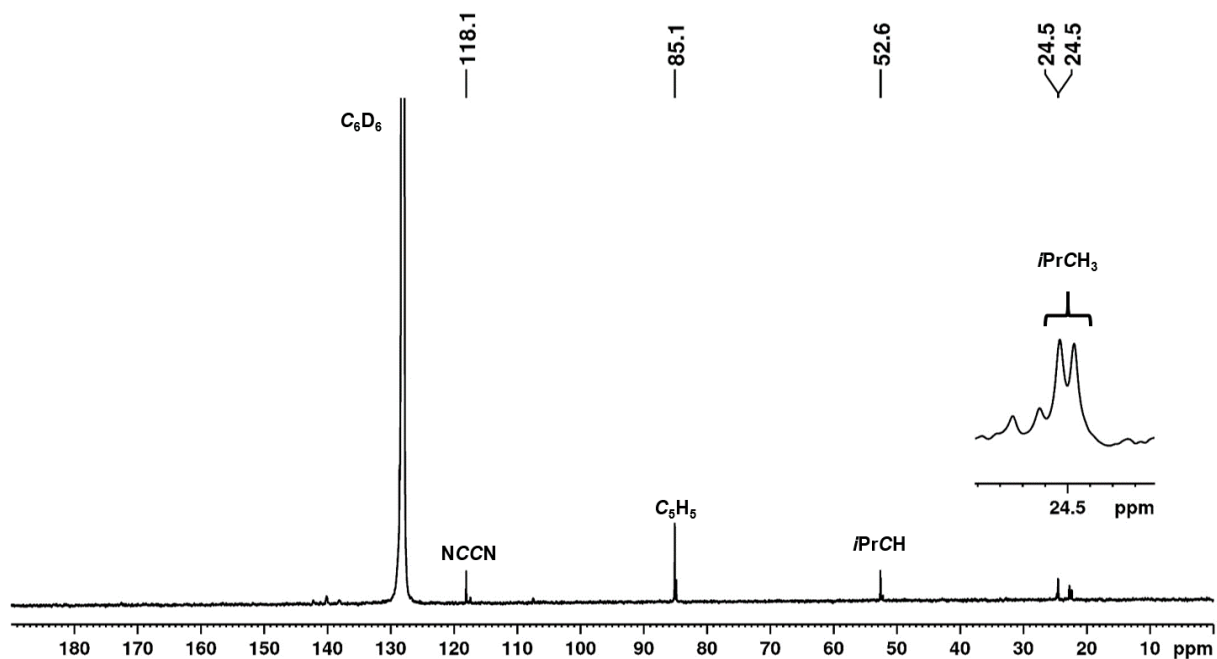

**Figure S37:**  $^{13}\text{C}$ -NMR spectrum of complex  $[\text{CpCo}(\text{iPr}_2\text{Im})(\eta^2\text{-C}_{10}\text{F}_8)]$  **19** in  $\text{C}_6\text{D}_6$ .

**$[\text{Cp}^*\text{Co}(\text{iPr}_2\text{Im})(\eta^2\text{-C}_{10}\text{F}_8)]$  **20****

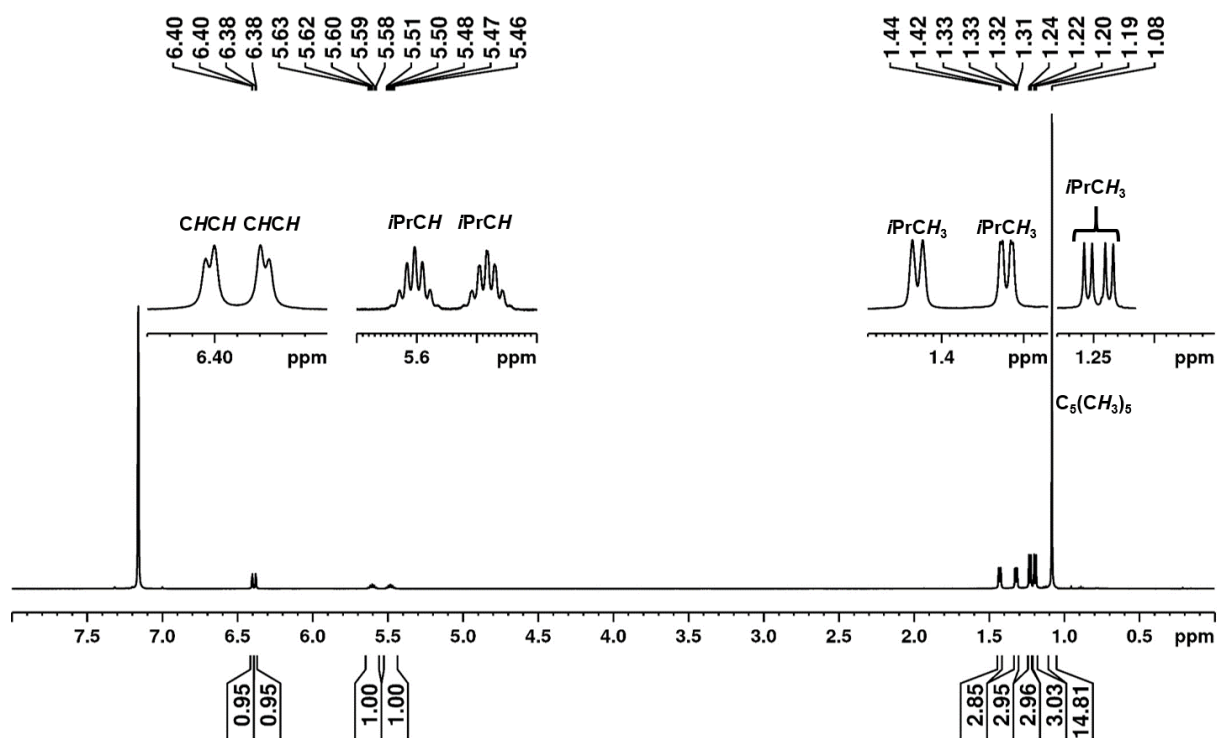

**Figure S38:**  $^1\text{H}$ -NMR spectrum of complex  $[\text{Cp}^*\text{Co}(\text{iPr}_2\text{Im})(\eta^2\text{-C}_{10}\text{F}_8)]$  **20** in  $\text{C}_6\text{D}_6$ .

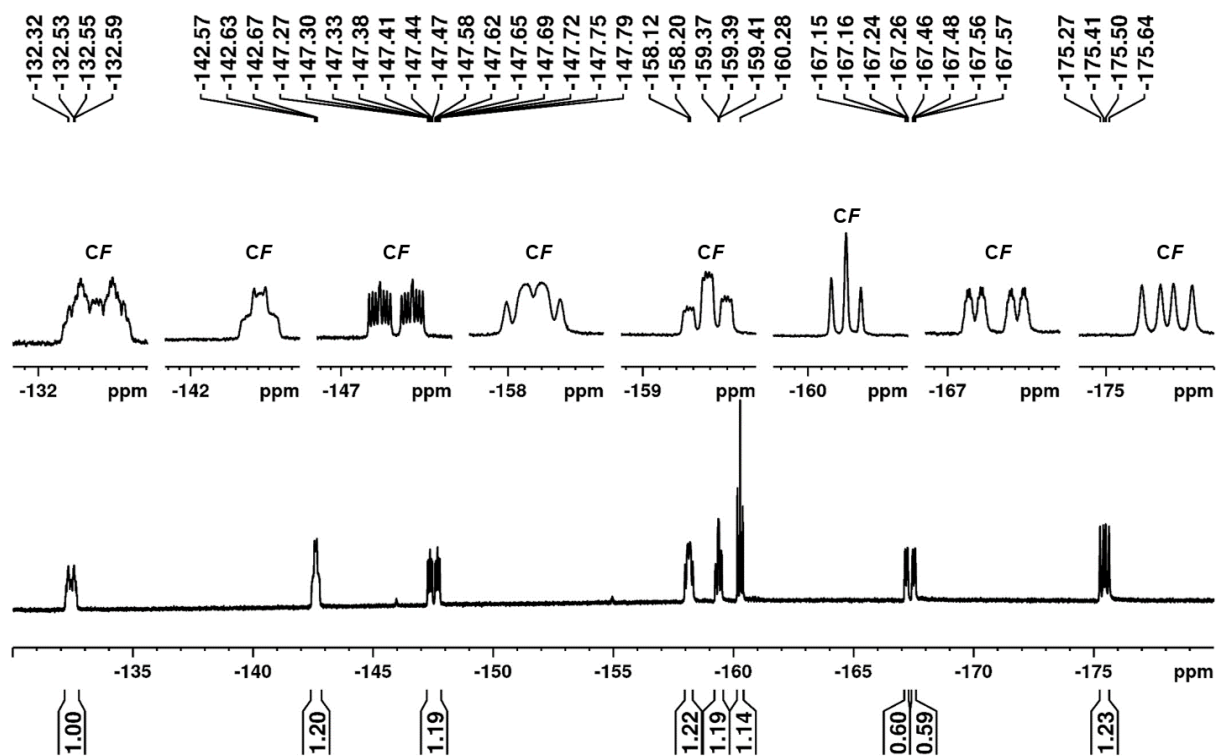

**Figure S39:**  $^{19}\text{F}$ -NMR spectrum of complex  $[\text{Cp}^*\text{Co}(\text{iPr}_2\text{Im})(\eta^2\text{-C}_{10}\text{F}_8)]$  **20** in  $\text{C}_6\text{D}_6$ .

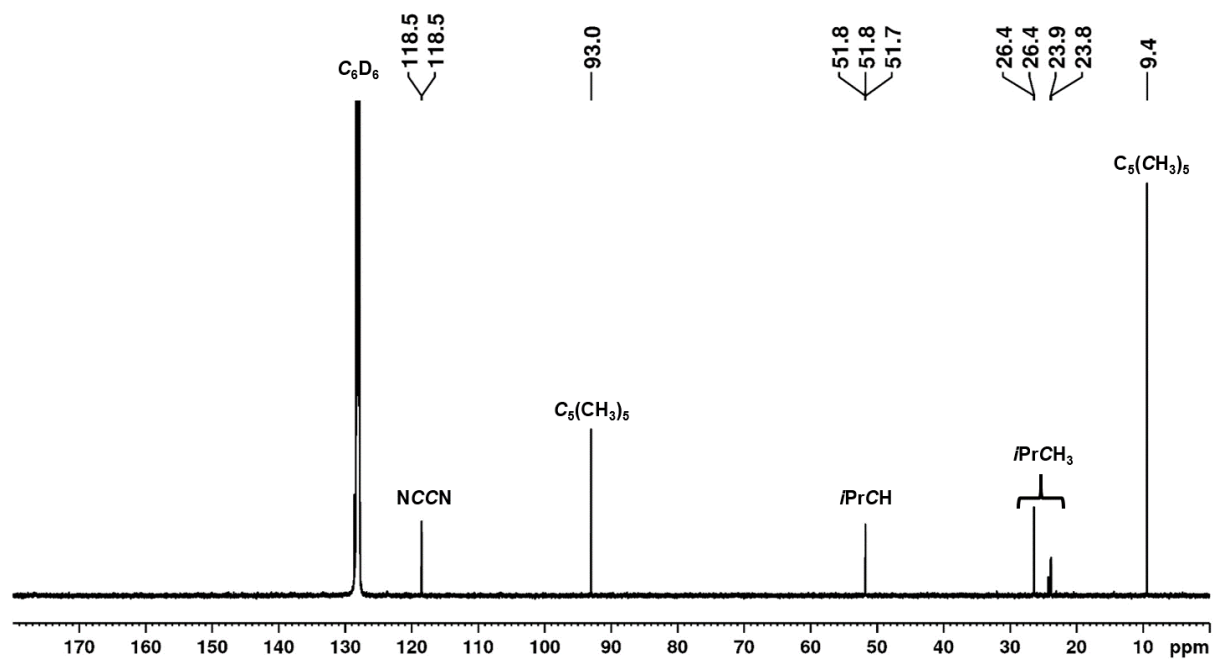

**Figure S40:**  $^{13}\text{C}$ -NMR spectrum of complex  $[\text{Cp}^*\text{Co}(\text{iPr}_2\text{Im})(\eta^2\text{-C}_{10}\text{F}_8)]$  **20** in  $\text{C}_6\text{D}_6$ .



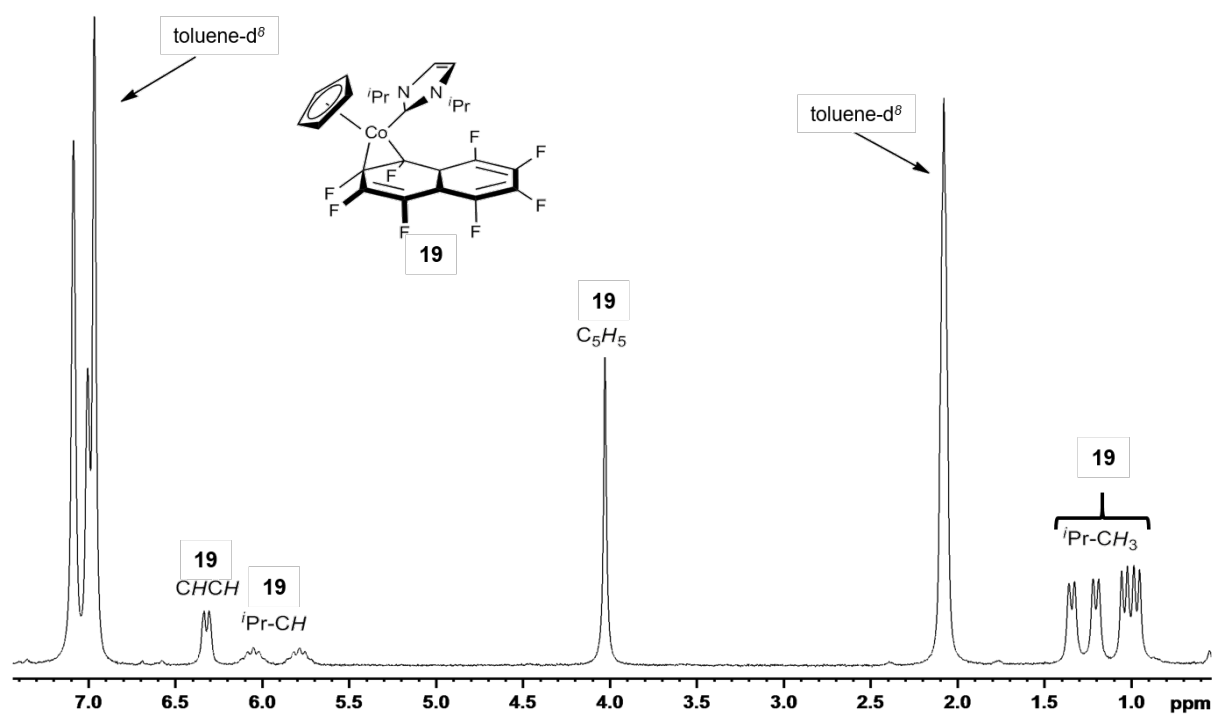

**Figure S41:**  $^1\text{H}$ -NMR time resolved spectrum of the conversion of complex  $[(\eta^5\text{-Cp})\text{Co}(i\text{Pr}_2\text{Im})(\eta^2\text{-C}_{10}\text{F}_8)]$  **19** to  $[(\eta^5\text{-Cp})\text{Co}(i\text{Pr}_2\text{Im})]_2(\eta^2, \eta^2\text{-C}_{10}\text{F}_8)$  **18** in toluene- $d^8$  at  $80^\circ\text{C}$  and  $t = 0$  min.

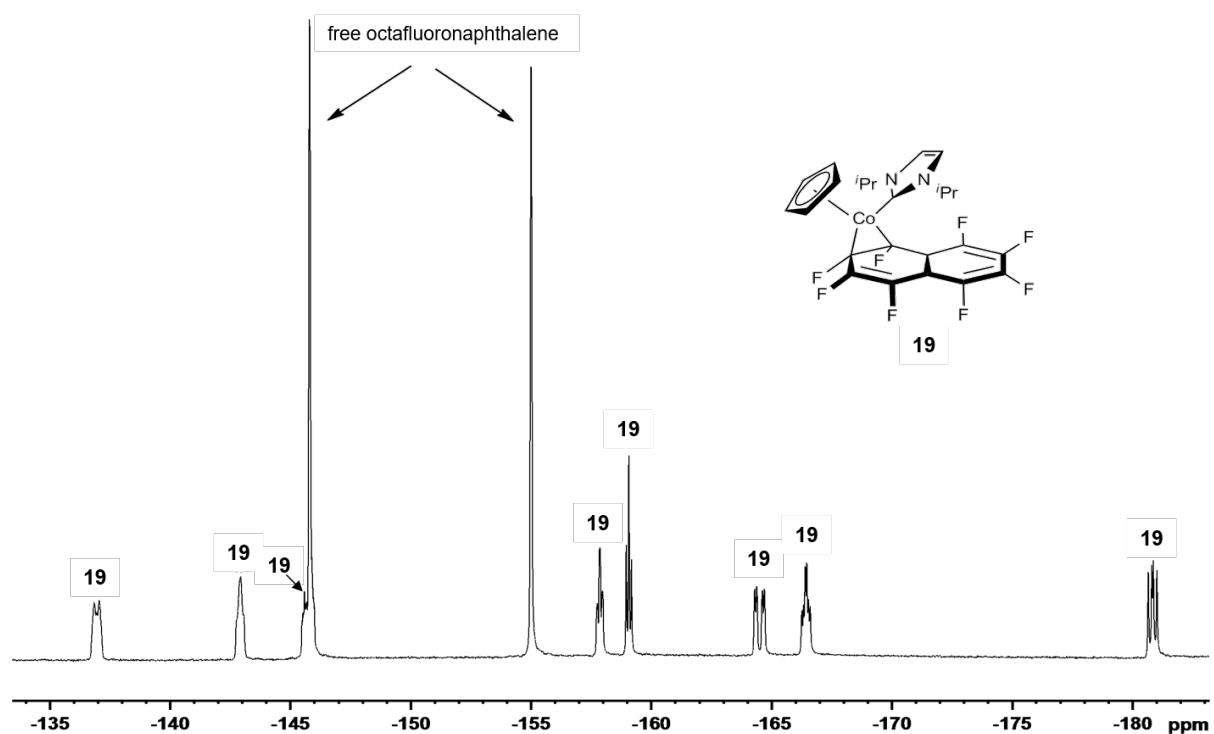

**Figure S42:**  $^{19}\text{F}$ -NMR time resolved spectrum of the conversion of complex  $[\text{CpCo}(i\text{Pr}_2\text{Im})(\eta^2\text{-C}_{10}\text{F}_8)]$  **19** to  $[(\text{CpCo}(i\text{Pr}_2\text{Im}))_2(\eta^2, \eta^2\text{-C}_{10}\text{F}_8)]$  **18** in toluene- $d^8$  at  $80^\circ\text{C}$  and  $t = 0$  min.

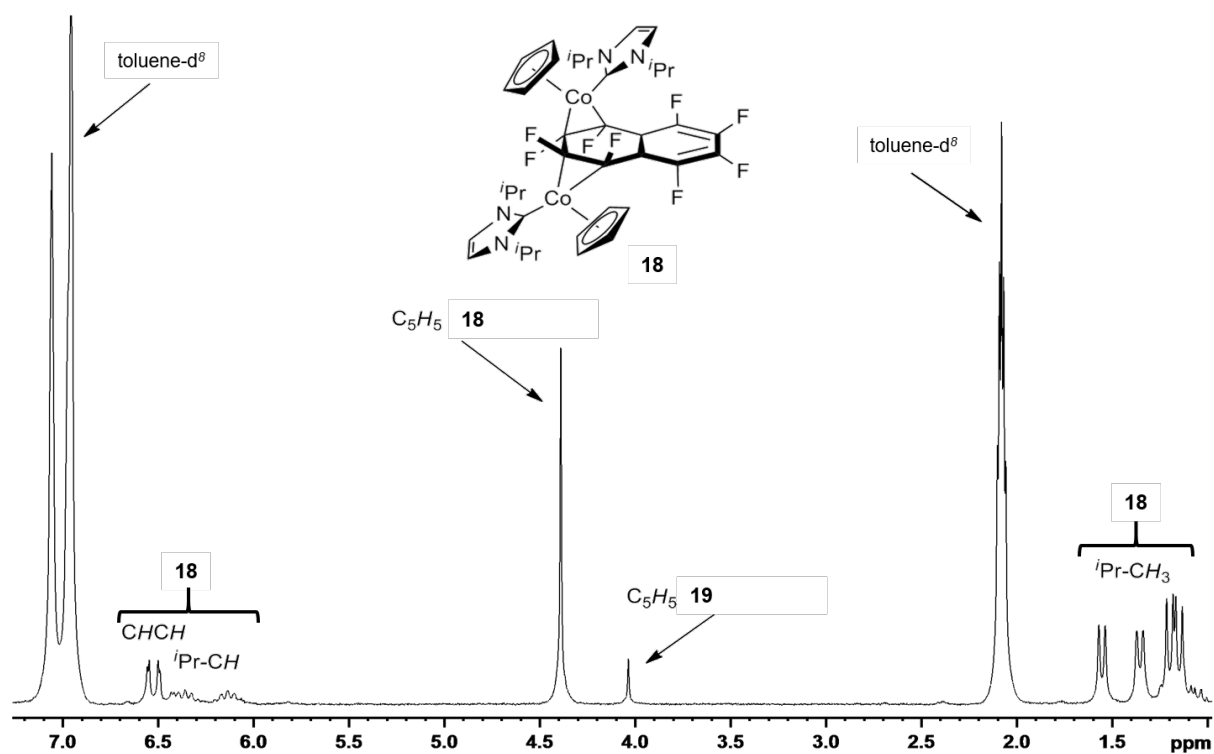

**Figure S43:**  $^1\text{H}$ -NMR time resolved spectrum of the conversion of complex  $[\text{CpCo}(\text{iPr}_2\text{Im})(\eta^2\text{-C}_{10}\text{F}_8)]$  **19** to  $[\{\text{CpCo}(\text{iPr}_2\text{Im})\}_2(\eta^2, \eta^2\text{-C}_{10}\text{F}_8)]$  **18** in toluene- $\text{d}_8$  at  $80^\circ\text{C}$  and  $t = 180$  min.

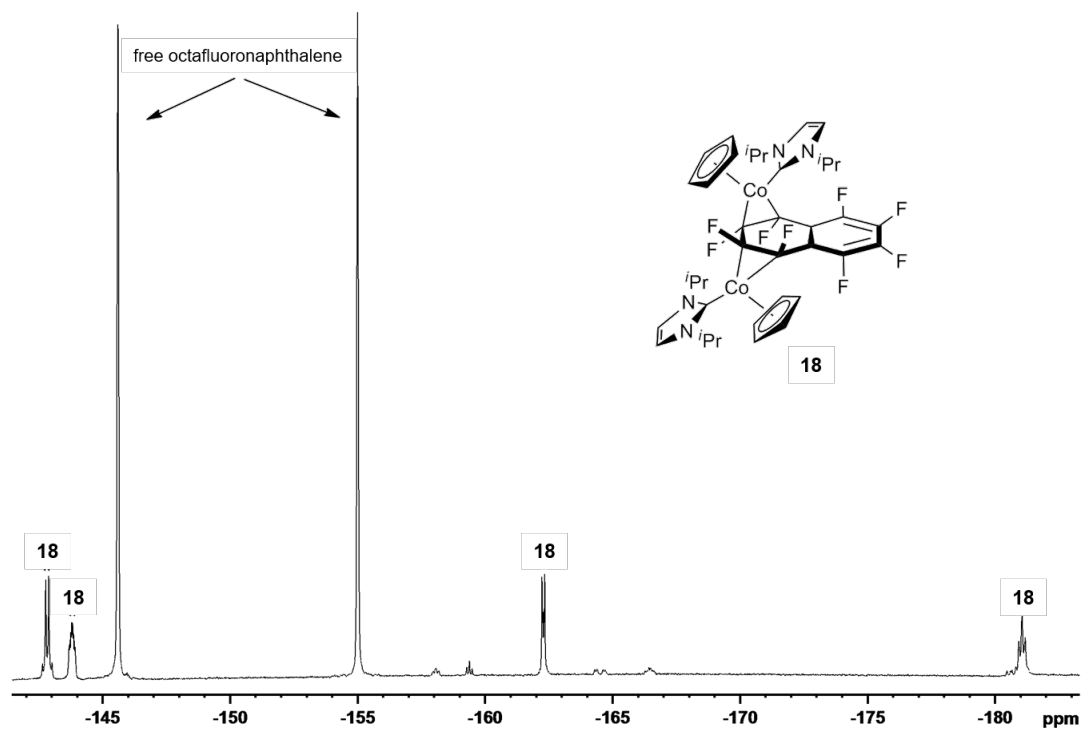

**Figure S44:**  $^{19}\text{F}$ -NMR time resolved spectrum of the conversion of complex  $[\text{CpCo}(\text{iPr}_2\text{Im})(\eta^2\text{-C}_{10}\text{F}_8)]$  **19** to  $[\{\text{CpCo}(\text{iPr}_2\text{Im})\}_2(\eta^2, \eta^2\text{-C}_{10}\text{F}_8)]$  **18** in toluene- $\text{d}_8$  at  $80^\circ\text{C}$  and  $t =$

180 min. (free uncoordinated octafluoronaphthalene couldn't be removed during the work-up procedure).

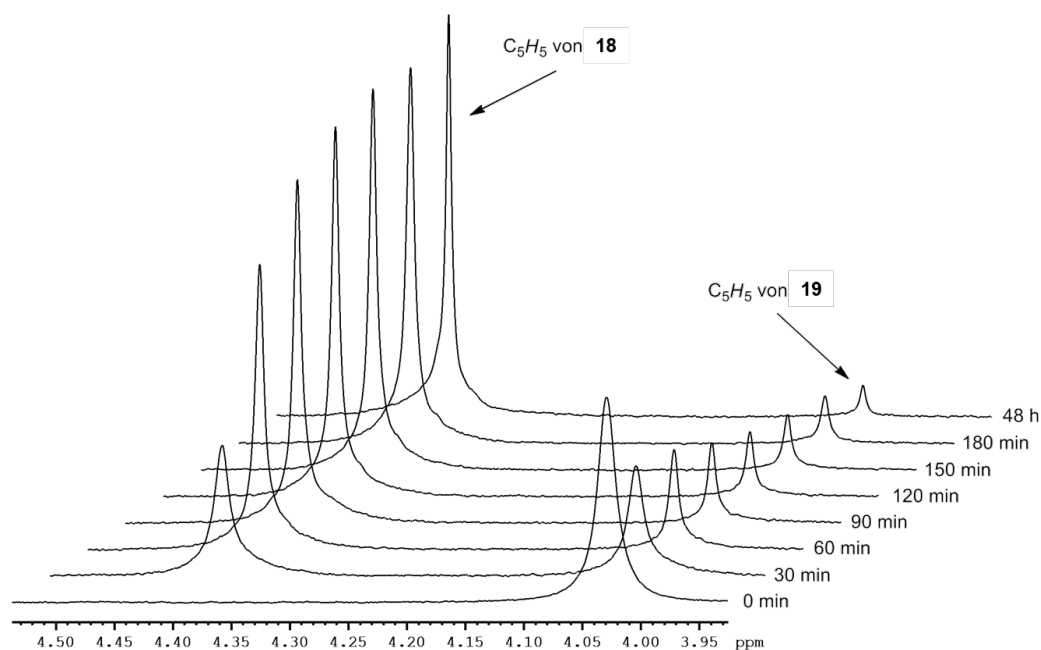

**Figure S45:** <sup>1</sup>H-NMR time resolved spectrum of the conversion of complex [CpCo(*i*Pr<sub>2</sub>Im)( $\eta^2$ -C<sub>10</sub>F<sub>8</sub>)] **19** to [(CpCo(*i*Pr<sub>2</sub>Im))<sub>2</sub>( $\eta^2, \eta^2$ -C<sub>10</sub>F<sub>8</sub>)] **18** in toluene-d<sup>8</sup> at 80 °C at different times.

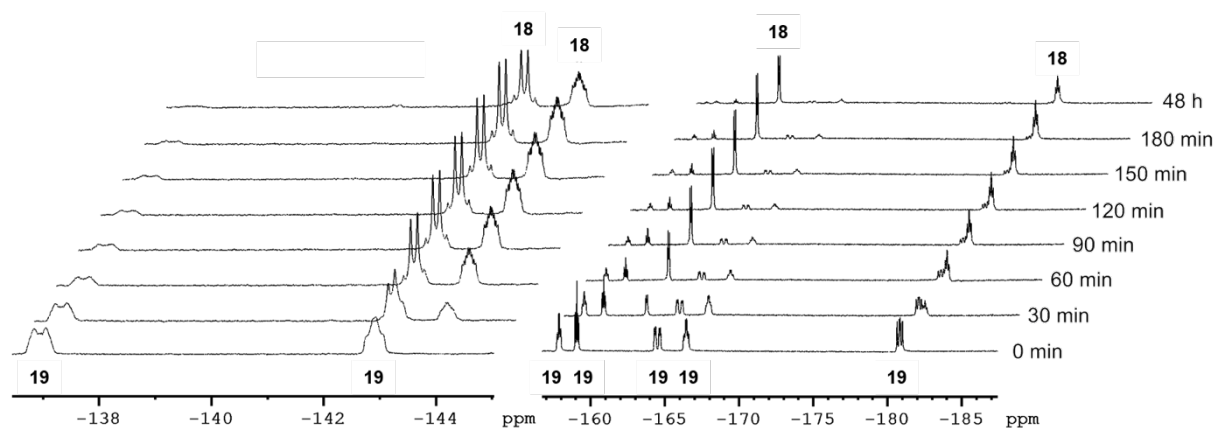

**Figure S46:** <sup>19</sup>F-NMR time resolved spectrum of the conversion of complex [CpCo(*i*Pr<sub>2</sub>Im)( $\eta^2$ -C<sub>10</sub>F<sub>8</sub>)] **19** to [(CpCo(*i*Pr<sub>2</sub>Im))<sub>2</sub>( $\eta^2, \eta^2$ -C<sub>10</sub>F<sub>8</sub>)] **18** in toluene-d<sup>8</sup> at 80 °C at different times.
